# Supplementary material for: Transcriptomic comparison between Brassica oleracea and rice (Oryza sativa) reveals diverse modulations on cell death in response to Sclerotinia sclerotiorum
Source: Sci Rep. 2016 Sep 20;6:33706. doi: 10.1038/srep33706 (PMC5028746; doi:10.1038/srep33706)

**Transcriptomic comparison between *Brassica oleracea* and rice (*Oryza sativa*)  
reveals diverse modulations on cell death in response to *Sclerotinia sclerotiorum***

Jiaqin Mei<sup>1</sup>, Yijuan Ding<sup>1</sup>, Yuehua Li<sup>1</sup>, Chaobo Tong<sup>2</sup>, Hai Du<sup>1</sup>, Yang Yu<sup>3</sup>, Huafan  
Wan<sup>1</sup>, Qing Xiong<sup>4</sup>, Jingyin Yu<sup>2</sup>, Shengyi Liu<sup>2</sup>, Jiana Li<sup>1</sup>, Wei Qian<sup>1\*</sup>

**Supplementary Table1** Summary of sequence read alignments to the reference genomes of *Brassica oleracea* and rice

| Sample               | Os0           |            | Os6           |            | Os12          |            |
|----------------------|---------------|------------|---------------|------------|---------------|------------|
|                      | Number        | Percentage | Number        | Percentage | Number        | Percentage |
| Total Reads          | 31,325,474    |            | 35,918,740    |            | 35,210,272    |            |
| Total BasePairs      | 3,932,668,792 |            | 4,507,561,147 |            | 4,421,821,229 |            |
| <b>Map to Genome</b> |               |            |               |            |               |            |
| Total mapped reads   | 25,021,122    | 79%        | 27,657,138    | 77%        | 25,924,464    | 73%        |
| Unique match         | 24,581,025    | 78.00%     | 27,115,393    | 75%        | 25,426,827    | 72%        |

Continued

| Sample               | R0         |            | R6         |            | R12        |            |
|----------------------|------------|------------|------------|------------|------------|------------|
|                      | Number     | Percentage | Number     | Percentage | Number     | Percentage |
| Total Reads          | 26153966   |            | 26366740   |            | 24692942   |            |
| Total BasePairs      | 2353856940 |            | 2373006600 |            | 2222364780 |            |
| <b>Map to Genome</b> |            |            |            |            |            |            |
| Total mapped reads   | 63         | 70%        | 18103863   | 69%        | 16989248   | 69%        |
| Unique match         | 17258138   | 66%        | 16913098   | 64%        | 16079529   | 65%        |

Continued

| Sample               | S0         |            | S6         |            | S12        |            |
|----------------------|------------|------------|------------|------------|------------|------------|
|                      | Number     | Percentage | Number     | Percentage | Number     | Percentage |
| Total Reads          | 24904228   |            | 26296584   |            | 25114528   |            |
| Total BasePairs      | 2241380520 |            | 2366692560 |            | 2260307520 |            |
| <b>Map to Genome</b> |            |            |            |            |            |            |
| Total mapped reads   | 18773809   | 75%        | 19990677   | 76%        | 18790793   | 75%        |
| Unique match         | 17652882   | 71%        | 18915745   | 72%        | 17714157   | 71%        |

**Supplementary Table 2** Common DEGs found in rice and *Brassica oleracea* during 0 to 12 hpi by *Sclerotinia sclerotiorum*

| Arabidopsis<br>homologous | RPKM   |       |        |        |        |        |        |        |        |
|---------------------------|--------|-------|--------|--------|--------|--------|--------|--------|--------|
|                           | R0     | R6    | R12    | S0     | S6     | S12    | Os0    | Os6    | Os12   |
| AT1G01060                 | 321.0  | 30.1  | 154.8  | 229.5  | 31.3   | 15.6   | 1272.8 | 275.6  | 132.9  |
| AT1G01070                 | 2.7    | 11.1  | 9.3    | 5.0    | 8.8    | 17.4   | 2.9    | 33.6   | 9.5    |
| AT1G01190                 | 2.7    | 0.7   | 0.2    | 3.4    | 3.7    | 0.3    | 36.8   | 161.5  | 185.2  |
| AT1G01580                 | 13.7   | 11.0  | 10.2   | 18.5   | 9.2    | 5.7    | 5.3    | 4.6    | 0.8    |
| AT1G01630                 | 134.6  | 63.4  | 83.7   | 131.4  | 72.9   | 147.8  | 214.7  | 50.2   | 45.4   |
| AT1G02335                 | 56.2   | 38.1  | 38.3   | 50.4   | 21.8   | 21.9   | 2.2    | 7.1    | 4.2    |
| AT1G02370                 | 8.4    | 11.0  | 24.2   | 12.3   | 17.3   | 17.0   | 2.5    | 5.8    | 7.9    |
| AT1G02470                 | 2.4    | 7.8   | 4.7    | 7.5    | 21.3   | 47.4   | 107.2  | 31.0   | 27.1   |
| AT1G02660                 | 16.1   | 41.0  | 40.5   | 9.5    | 54.7   | 30.1   | 8.6    | 13.9   | 3.0    |
| AT1G02860                 | 4.2    | 6.4   | 10.2   | 9.1    | 9.6    | 24.0   | 31.6   | 8.5    | 7.1    |
| AT1G03850                 | 18.1   | 12.6  | 10.4   | 4.4    | 22.4   | 37.1   | 27.0   | 33.0   | 11.9   |
| AT1G03870                 | 96.5   | 20.5  | 8.0    | 93.1   | 103.7  | 42.6   | 5.2    | 10.1   | 3.6    |
| AT1G03970                 | 14.8   | 29.1  | 34.5   | 11.9   | 30.3   | 27.2   | 35.7   | 29.7   | 58.1   |
| AT1G04000                 | 48.4   | 49.3  | 40.2   | 33.1   | 65.0   | 55.9   | 27.3   | 14.3   | 9.5    |
| AT1G04180                 | 1.0    | 1.3   | 0.7    | 1.7    | 3.8    | 0.8    | 6.2    | 1.8    | 1.8    |
| AT1G04280                 | 12.4   | 33.6  | 28.7   | 18.3   | 29.4   | 37.9   | 86.4   | 68.0   | 52.0   |
| AT1G04310                 | 9.4    | 17.3  | 22.5   | 7.8    | 12.6   | 8.3    | 28.6   | 80.0   | 60.3   |
| AT1G05200                 | 15.9   | 12.7  | 11.6   | 15.8   | 13.3   | 6.8    | 38.7   | 17.8   | 13.3   |
| AT1G05260                 | 21.2   | 3.1   | 2.6    | 4.7    | 1.0    | 2.9    | 4.1    | 12.9   | 10.4   |
| AT1G05850                 | 341.6  | 162.8 | 165.5  | 355.4  | 282.2  | 139.5  | 12.7   | 45.8   | 53.0   |
| AT1G05870                 | 63.8   | 54.6  | 61.0   | 70.0   | 65.0   | 71.3   | 124.0  | 81.5   | 84.9   |
| AT1G06040                 | 93.3   | 44.0  | 61.7   | 102.0  | 45.6   | 14.1   | 3519.5 | 1811.6 | 1222.3 |
| AT1G06180                 | 17.3   | 2.5   | 4.8    | 7.2    | 1.9    | 14.5   | 0.4    | 2.8    | 4.7    |
| AT1G06410                 | 17.2   | 22.1  | 25.6   | 17.4   | 29.5   | 16.3   | 65.7   | 77.7   | 72.6   |
| AT1G06570                 | 76.2   | 738.9 | 1462.8 | 278.3  | 780.3  | 1772.0 | 73.4   | 15.2   | 7.4    |
| AT1G06780                 | 19.2   | 40.9  | 47.9   | 32.2   | 31.2   | 42.7   | 4.3    | 0.8    | 0.6    |
| AT1G06950                 | 258.8  | 228.0 | 296.2  | 222.2  | 214.9  | 173.9  | 298.3  | 152.7  | 55.2   |
| AT1G07010                 | 44.7   | 36.2  | 45.2   | 69.8   | 34.3   | 20.0   | 88.1   | 17.1   | 30.6   |
| AT1G07180                 | 16.7   | 17.4  | 11.0   | 42.3   | 27.3   | 26.1   | 33.6   | 8.8    | 9.2    |
| AT1G07280                 | 126.1  | 393.9 | 346.8  | 188.0  | 261.5  | 224.8  | 60.7   | 124.9  | 53.0   |
| AT1G07420                 | 17.6   | 20.0  | 12.4   | 13.2   | 22.3   | 9.2    | 140.9  | 38.8   | 34.4   |
| AT1G07430                 | 11.5   | 6.7   | 15.4   | 7.3    | 7.0    | 3.3    | 184.9  | 27.5   | 3.5    |
| AT1G07520                 | 2.4    | 3.1   | 3.3    | 3.0    | 3.0    | 3.3    | 132.9  | 46.3   | 44.9   |
| AT1G07620                 | 1.3    | 2.3   | 2.6    | 0.6    | 2.6    | 6.0    | 10.8   | 3.8    | 3.2    |
| AT1G08380                 | 1102.0 | 939.4 | 491.8  | 2951.5 | 2478.4 | 1935.1 | 2751.3 | 1748.1 | 400.0  |
| AT1G08465                 | 98.9   | 88.1  | 93.1   | 61.3   | 105.7  | 85.0   | 8.9    | 18.4   | 10.5   |
| AT1G08570                 | 79.0   | 149.1 | 132.4  | 144.8  | 137.0  | 102.3  | 636.3  | 208.7  | 137.8  |
| AT1G08630                 | 13.7   | 9.6   | 117.8  | 28.9   | 34.9   | 46.1   | 40.6   | 7.4    | 9.7    |
| AT1G09210                 | 127.9  | 109.8 | 99.1   | 80.5   | 53.0   | 42.3   | 61.1   | 193.4  | 255.3  |
| AT1G09350                 | 14.6   | 5.3   | 53.0   | 3.6    | 3.8    | 0.1    | 11.3   | 43.9   | 77.5   |
| AT1G09460                 | 11.5   | 23.0  | 21.6   | 7.6    | 21.4   | 19.8   | 0.5    | 4.2    | 2.6    |
| AT1G09660                 | 12.6   | 5.1   | 4.9    | 15.1   | 8.7    | 6.5    | 91.1   | 52.3   | 37.5   |
| AT1G10020                 | 38.0   | 31.9  | 36.7   | 30.0   | 41.7   | 29.9   | 11.1   | 18.1   | 9.7    |

|           |        |        |       |        |        |       |       |       |       |
|-----------|--------|--------|-------|--------|--------|-------|-------|-------|-------|
| AT1G10060 | 34.8   | 7.0    | 8.2   | 38.9   | 10.3   | 12.4  | 20.3  | 4.8   | 3.4   |
| AT1G10360 | 20.2   | 8.7    | 14.7  | 30.3   | 6.3    | 4.4   | 517.0 | 181.0 | 126.9 |
| AT1G10522 | 27.5   | 10.1   | 11.5  | 31.1   | 18.9   | 12.0  | 5.0   | 8.0   | 18.6  |
| AT1G10660 | 10.7   | 22.3   | 12.5  | 12.9   | 20.2   | 14.0  | 41.9  | 11.0  | 5.0   |
| AT1G10820 | 19.4   | 14.2   | 14.5  | 15.8   | 12.0   | 14.8  | 83.4  | 47.3  | 51.9  |
| AT1G11530 | 8.8    | 46.5   | 51.2  | 23.3   | 75.2   | 104.6 | 126.1 | 45.5  | 52.1  |
| AT1G11700 | 49.7   | 30.2   | 31.3  | 64.0   | 34.9   | 55.6  | 161.4 | 29.6  | 19.4  |
| AT1G11960 | 12.4   | 5.7    | 4.3   | 3.2    | 4.9    | 4.3   | 54.4  | 46.0  | 52.0  |
| AT1G12000 | 9.1    | 3.1    | 4.0   | 7.3    | 5.2    | 4.9   | 20.1  | 57.6  | 58.9  |
| AT1G12040 | 2.6    | 2.2    | 1.9   | 1.0    | 0.9    | 0.3   | 3.7   | 4.5   | 1.5   |
| AT1G12110 | 38.7   | 49.9   | 29.2  | 26.7   | 35.6   | 39.0  | 82.5  | 79.4  | 60.5  |
| AT1G12240 | 55.2   | 34.2   | 51.2  | 100.9  | 34.4   | 33.4  | 7.3   | 21.0  | 13.1  |
| AT1G12380 | 25.2   | 7.4    | 7.0   | 11.4   | 4.9    | 2.1   | 0.3   | 1.3   | 1.5   |
| AT1G12710 | 1.7    | 14.7   | 7.3   | 2.0    | 21.9   | 13.4  | 219.7 | 190.7 | 175.4 |
| AT1G12880 | 3.8    | 5.0    | 8.9   | 4.9    | 6.4    | 16.5  | 5.6   | 6.9   | 11.8  |
| AT1G12900 | 508.5  | 302.1  | 218.7 | 813.8  | 517.4  | 217.6 | 626.1 | 320.5 | 88.8  |
| AT1G13250 | 12.1   | 7.6    | 5.6   | 5.1    | 5.0    | 2.3   | 0.6   | 3.6   | 1.5   |
| AT1G13260 | 144.9  | 228.0  | 225.5 | 153.0  | 273.0  | 171.6 | 174.3 | 147.7 | 140.2 |
| AT1G13740 | 49.6   | 43.4   | 39.6  | 67.6   | 48.4   | 54.1  | 53.6  | 42.5  | 47.0  |
| AT1G13750 | 5.1    | 5.3    | 3.3   | 4.2    | 3.7    | 1.8   | 18.8  | 69.1  | 71.2  |
| AT1G13930 | 101.0  | 108.3  | 122.8 | 171.1  | 166.8  | 49.1  | 112.4 | 339.0 | 220.3 |
| AT1G14390 | 0.3    | 0.7    | 1.0   | 0.1    | 0.8    | 1.0   | 1.7   | 6.3   | 2.8   |
| AT1G14520 | 0.5    | 2.4    | 1.1   | 0.4    | 3.5    | 4.4   | 1.9   | 4.0   | 1.4   |
| AT1G14700 | 38.8   | 12.1   | 9.8   | 51.6   | 12.9   | 14.9  | 56.5  | 12.7  | 11.4  |
| AT1G14860 | 5.5    | 8.4    | 11.1  | 15.5   | 16.4   | 18.9  | 154.3 | 85.0  | 49.9  |
| AT1G14870 | 269.2  | 418.7  | 344.1 | 142.6  | 290.3  | 699.6 | 77.7  | 288.4 | 358.3 |
| AT1G15000 | 65.9   | 20.2   | 16.9  | 35.7   | 14.9   | 14.7  | 13.2  | 9.3   | 9.6   |
| AT1G15380 | 4.7    | 7.5    | 180.7 | 3.2    | 16.1   | 50.2  | 10.0  | 99.6  | 22.9  |
| AT1G15500 | 78.6   | 82.4   | 58.7  | 88.2   | 99.2   | 46.1  | 67.9  | 256.7 | 252.0 |
| AT1G15520 | 3.5    | 8.6    | 7.2   | 1.0    | 1.3    | 5.6   | 4.1   | 13.0  | 11.0  |
| AT1G15670 | 4.9    | 11.6   | 10.8  | 3.8    | 11.6   | 14.2  | 16.0  | 62.5  | 29.4  |
| AT1G15690 | 209.2  | 412.3  | 912.5 | 349.0  | 506.2  | 445.6 | 226.0 | 466.7 | 328.5 |
| AT1G15820 | 1760.6 | 1124.7 | 445.9 | 2020.2 | 1617.6 | 556.8 | 295.2 | 924.6 | 130.6 |
| AT1G15980 | 86.6   | 85.1   | 41.2  | 85.9   | 86.8   | 70.7  | 17.6  | 27.4  | 70.6  |
| AT1G16350 | 114.0  | 48.4   | 70.1  | 106.6  | 50.3   | 47.6  | 5.9   | 26.5  | 23.4  |
| AT1G17050 | 16.4   | 8.7    | 8.9   | 22.1   | 10.6   | 10.0  | 45.1  | 16.4  | 15.2  |
| AT1G17380 | 106.2  | 44.1   | 59.3  | 49.4   | 32.5   | 84.6  | 206.4 | 211.8 | 265.5 |
| AT1G17430 | 2.5    | 6.4    | 6.0   | 2.0    | 7.3    | 4.0   | 10.1  | 3.3   | 1.1   |
| AT1G17870 | 0.1    | 0.7    | 0.7   | 0.3    | 0.4    | 0.6   | 119.4 | 14.8  | 3.4   |
| AT1G18250 | 40.8   | 4.5    | 2.8   | 14.8   | 2.5    | 1.9   | 0.1   | 2.0   | 0.3   |
| AT1G18330 | 43.7   | 26.4   | 27.4  | 61.2   | 26.6   | 29.5  | 86.1  | 61.2  | 70.4  |
| AT1G18480 | 7.2    | 11.3   | 9.7   | 5.9    | 8.8    | 9.2   | 0.6   | 4.9   | 4.4   |
| AT1G18620 | 16.5   | 16.0   | 9.6   | 19.9   | 25.6   | 18.1  | 1.5   | 2.4   | 1.7   |
| AT1G18670 | 4.5    | 4.8    | 1.7   | 2.9    | 3.3    | 1.6   | 14.3  | 36.8  | 36.6  |
| AT1G18880 | 2.2    | 1.9    | 4.7   | 2.2    | 2.9    | 2.9   | 263.2 | 344.5 | 307.8 |
| AT1G19150 | 51.4   | 16.1   | 3.6   | 76.6   | 41.8   | 9.6   | 13.5  | 25.4  | 55.4  |
| AT1G19660 | 101.9  | 300.9  | 233.5 | 146.6  | 247.8  | 167.4 | 63.7  | 427.1 | 479.9 |
| AT1G19670 | 122.1  | 19.2   | 7.5   | 55.8   | 13.2   | 7.9   | 45.3  | 15.9  | 18.6  |

|           |       |        |        |        |        |        |        |        |        |
|-----------|-------|--------|--------|--------|--------|--------|--------|--------|--------|
| AT1G19835 | 97.8  | 53.5   | 64.6   | 61.4   | 49.8   | 46.0   | 0.9    | 5.6    | 1.7    |
| AT1G20020 | 358.7 | 451.2  | 271.6  | 435.9  | 434.3  | 171.1  | 1914.4 | 725.5  | 746.0  |
| AT1G20640 | 21.3  | 32.1   | 56.3   | 25.6   | 38.4   | 46.5   | 31.2   | 10.6   | 7.6    |
| AT1G20900 | 0.8   | 16.7   | 16.1   | 2.4    | 30.4   | 13.3   | 1.1    | 4.8    | 2.6    |
| AT1G21210 | 2.6   | 0.9    | 2.7    | 0.3    | 0.9    | 0.5    | 0.6    | 5.4    | 9.9    |
| AT1G21440 | 6.3   | 1.8    | 1.3    | 7.1    | 1.9    | 2.4    | 127.8  | 49.5   | 2.0    |
| AT1G21460 | 100.8 | 110.2  | 95.7   | 145.1  | 90.3   | 111.7  | 240.4  | 288.7  | 126.3  |
| AT1G21500 | 383.3 | 307.2  | 150.2  | 480.9  | 332.4  | 222.8  | 32.9   | 125.2  | 86.6   |
| AT1G21560 | 8.0   | 2.7    | 3.0    | 6.4    | 6.1    | 5.3    | 48.1   | 24.7   | 29.3   |
| AT1G21880 | 48.9  | 24.5   | 18.8   | 42.8   | 35.1   | 23.0   | 16.2   | 11.9   | 13.0   |
| AT1G22070 | 40.1  | 75.7   | 66.1   | 31.4   | 77.9   | 50.7   | 113.0  | 37.2   | 30.3   |
| AT1G22160 | 29.8  | 20.4   | 22.7   | 46.3   | 23.7   | 23.7   | 1332.1 | 511.1  | 473.3  |
| AT1G22190 | 48.5  | 32.8   | 27.1   | 28.2   | 64.5   | 40.9   | 634.1  | 270.4  | 220.5  |
| AT1G22640 | 13.3  | 34.2   | 55.0   | 19.5   | 26.3   | 57.1   | 14.1   | 46.9   | 40.8   |
| AT1G22770 | 10.1  | 74.0   | 33.8   | 14.0   | 78.5   | 21.1   | 72.7   | 120.3  | 50.7   |
| AT1G22850 | 79.0  | 57.5   | 63.8   | 83.6   | 52.8   | 33.6   | 77.0   | 23.2   | 21.7   |
| AT1G23390 | 36.4  | 82.1   | 93.1   | 41.1   | 74.2   | 58.0   | 19.0   | 58.1   | 49.5   |
| AT1G23710 | 34.0  | 46.9   | 62.6   | 31.3   | 98.0   | 135.8  | 138.5  | 72.8   | 59.0   |
| AT1G23740 | 44.4  | 28.7   | 15.0   | 64.6   | 42.9   | 11.0   | 229.6  | 77.4   | 72.9   |
| AT1G24140 | 6.4   | 14.4   | 7.7    | 2.3    | 10.8   | 12.7   | 5.2    | 6.2    | 5.6    |
| AT1G24470 | 34.6  | 18.1   | 17.4   | 24.3   | 16.7   | 15.8   | 4.1    | 8.1    | 3.6    |
| AT1G24530 | 16.3  | 39.0   | 39.4   | 10.0   | 48.4   | 53.2   | 0.4    | 3.1    | 2.4    |
| AT1G25470 | 3.9   | 6.7    | 8.5    | 8.2    | 8.7    | 20.2   | 16.3   | 5.7    | 4.0    |
| AT1G25510 | 2.7   | 0.7    | 0.8    | 2.0    | 1.9    | 1.2    | 2.0    | 5.4    | 1.5    |
| AT1G26790 | 35.7  | 1.8    | 6.0    | 48.3   | 2.7    | 3.9    | 207.2  | 68.5   | 38.5   |
| AT1G27100 | 22.8  | 16.7   | 17.5   | 22.5   | 52.5   | 53.5   | 5.0    | 11.0   | 16.1   |
| AT1G27930 | 74.4  | 78.8   | 76.1   | 55.1   | 52.7   | 42.8   | 2.1    | 0.3    | 0.1    |
| AT1G28050 | 33.8  | 113.6  | 92.0   | 32.6   | 117.4  | 75.9   | 7.7    | 65.3   | 47.3   |
| AT1G28330 | 960.2 | 5083.2 | 4064.5 | 1482.2 | 5536.5 | 7341.1 | 862.0  | 2574.3 | 2956.0 |
| AT1G28440 | 56.3  | 54.3   | 44.8   | 50.5   | 59.9   | 30.8   | 35.3   | 116.9  | 130.4  |
| AT1G28570 | 46.1  | 34.1   | 29.5   | 59.9   | 38.1   | 33.8   | 20.8   | 15.6   | 12.9   |
| AT1G29050 | 21.0  | 13.4   | 10.7   | 14.2   | 18.3   | 14.8   | 2.4    | 7.0    | 0.5    |
| AT1G29900 | 16.8  | 14.5   | 16.0   | 16.7   | 15.8   | 6.5    | 24.2   | 73.1   | 54.7   |
| AT1G29980 | 22.5  | 8.3    | 4.4    | 14.1   | 10.5   | 5.3    | 0.6    | 3.1    | 0.6    |
| AT1G30230 | 245.6 | 131.2  | 128.2  | 152.8  | 155.4  | 172.7  | 187.7  | 302.2  | 443.7  |
| AT1G30380 | 714.3 | 419.3  | 232.9  | 1111.1 | 645.3  | 436.0  | 4045.6 | 1441.2 | 415.4  |
| AT1G30820 | 11.3  | 41.0   | 56.7   | 29.8   | 63.7   | 83.2   | 35.2   | 44.0   | 35.9   |
| AT1G31350 | 15.3  | 8.1    | 14.8   | 18.3   | 10.6   | 34.9   | 11.1   | 1.4    | 0.4    |
| AT1G32120 | 19.9  | 24.7   | 22.2   | 13.2   | 20.9   | 23.3   | 19.7   | 9.6    | 8.4    |
| AT1G32350 | 18.5  | 79.5   | 95.7   | 18.0   | 50.0   | 126.4  | 56.5   | 15.7   | 12.1   |
| AT1G32450 | 7.9   | 7.6    | 16.0   | 11.6   | 4.6    | 8.2    | 2.3    | 6.3    | 4.2    |
| AT1G34340 | 16.4  | 7.8    | 7.1    | 9.5    | 4.4    | 1.8    | 22.9   | 10.9   | 9.6    |
| AT1G44120 | 0.9   | 2.0    | 2.5    | 1.3    | 1.8    | 1.4    | 0.6    | 2.2    | 1.8    |
| AT1G44446 | 94.6  | 41.1   | 67.4   | 124.5  | 56.2   | 25.9   | 372.4  | 165.0  | 62.0   |
| AT1G44575 | 364.0 | 331.8  | 146.8  | 430.4  | 227.1  | 68.8   | 631.9  | 114.8  | 36.7   |
| AT1G45201 | 93.0  | 86.9   | 47.4   | 126.2  | 54.0   | 55.2   | 166.2  | 34.0   | 13.1   |
| AT1G45474 | 25.2  | 10.7   | 5.6    | 38.7   | 23.3   | 10.9   | 53.0   | 17.9   | 11.8   |
| AT1G45688 | 183.4 | 84.7   | 79.6   | 110.9  | 81.8   | 75.8   | 15.3   | 34.8   | 30.5   |

|           |       |       |       |       |       |       |       |       |       |
|-----------|-------|-------|-------|-------|-------|-------|-------|-------|-------|
| AT1G47580 | 8.9   | 8.9   | 4.4   | 14.9  | 11.0  | 24.6  | 0.4   | 1.7   | 4.5   |
| AT1G48260 | 1.8   | 1.8   | 1.1   | 2.0   | 3.3   | 0.7   | 502.4 | 224.9 | 248.5 |
| AT1G49320 | 4.1   | 5.7   | 9.2   | 8.3   | 1.9   | 9.3   | 371.7 | 57.7  | 18.2  |
| AT1G50420 | 33.1  | 45.6  | 45.0  | 25.0  | 35.0  | 17.7  | 119.1 | 110.4 | 34.8  |
| AT1G50630 | 1.5   | 3.4   | 3.4   | 5.9   | 1.8   | 2.7   | 134.9 | 58.4  | 59.6  |
| AT1G51140 | 45.3  | 20.2  | 46.8  | 82.3  | 20.5  | 40.8  | 248.5 | 364.0 | 397.2 |
| AT1G51680 | 95.6  | 19.5  | 26.2  | 33.0  | 10.8  | 5.2   | 70.7  | 162.7 | 147.7 |
| AT1G52720 | 6.0   | 12.7  | 13.7  | 20.0  | 40.9  | 65.7  | 174.5 | 317.0 | 849.9 |
| AT1G53270 | 8.0   | 6.3   | 7.3   | 6.8   | 5.3   | 2.4   | 0.0   | 1.6   | 0.2   |
| AT1G53300 | 9.2   | 6.0   | 4.0   | 7.7   | 7.1   | 2.6   | 1.0   | 6.2   | 1.3   |
| AT1G53730 | 35.7  | 16.2  | 17.1  | 24.9  | 20.0  | 16.9  | 13.1  | 26.4  | 22.3  |
| AT1G54050 | 11.0  | 6.5   | 1.8   | 31.2  | 10.0  | 6.7   | 18.7  | 2.0   | 1.6   |
| AT1G55260 | 54.3  | 12.2  | 19.2  | 59.3  | 25.1  | 37.9  | 151.5 | 114.6 | 186.5 |
| AT1G55450 | 39.6  | 73.4  | 50.9  | 27.1  | 83.1  | 72.2  | 21.6  | 8.3   | 5.2   |
| AT1G55740 | 16.0  | 113.5 | 249.0 | 12.6  | 85.9  | 70.4  | 1.4   | 5.6   | 2.2   |
| AT1G55850 | 20.6  | 39.9  | 39.8  | 18.3  | 30.6  | 37.4  | 75.8  | 38.8  | 30.6  |
| AT1G56300 | 4.4   | 27.8  | 16.9  | 4.0   | 47.1  | 27.0  | 15.0  | 57.6  | 23.8  |
| AT1G58180 | 24.4  | 86.0  | 125.9 | 70.0  | 136.6 | 232.0 | 187.7 | 50.2  | 32.6  |
| AT1G59730 | 7.0   | 1.1   | 5.9   | 4.0   | 5.5   | 7.3   | 179.9 | 66.1  | 66.0  |
| AT1G62250 | 6.8   | 4.3   | 3.6   | 5.0   | 5.6   | 2.4   | 694.9 | 90.0  | 27.0  |
| AT1G62760 | 2.2   | 167.8 | 245.3 | 34.7  | 176.6 | 473.6 | 5.4   | 48.5  | 19.9  |
| AT1G62770 | 86.2  | 34.0  | 24.2  | 59.3  | 31.3  | 28.8  | 11.5  | 17.8  | 15.0  |
| AT1G63220 | 12.4  | 3.7   | 1.8   | 7.7   | 6.5   | 2.2   | 19.5  | 64.7  | 107.4 |
| AT1G63840 | 30.8  | 33.9  | 23.9  | 23.8  | 42.5  | 45.4  | 86.0  | 35.4  | 22.5  |
| AT1G64090 | 34.0  | 20.2  | 29.3  | 39.3  | 33.1  | 39.5  | 434.7 | 263.9 | 263.6 |
| AT1G64500 | 74.0  | 19.3  | 36.3  | 99.8  | 59.8  | 50.4  | 494.1 | 148.5 | 105.0 |
| AT1G64680 | 69.7  | 20.4  | 46.9  | 109.3 | 18.9  | 13.1  | 268.5 | 52.5  | 15.2  |
| AT1G64780 | 6.1   | 3.5   | 14.8  | 13.3  | 6.6   | 3.8   | 348.2 | 131.2 | 146.6 |
| AT1G64980 | 117.9 | 45.7  | 33.7  | 56.5  | 38.6  | 29.8  | 3.8   | 4.8   | 0.6   |
| AT1G65060 | 9.5   | 0.2   | 0.3   | 5.2   | 1.1   | 0.6   | 2.3   | 5.0   | 0.1   |
| AT1G67300 | 21.9  | 9.9   | 17.6  | 35.7  | 13.9  | 15.1  | 116.5 | 21.6  | 15.2  |
| AT1G67370 | 3.2   | 8.1   | 6.4   | 3.8   | 6.3   | 4.1   | 17.0  | 6.5   | 5.6   |
| AT1G67840 | 17.4  | 20.3  | 16.5  | 16.4  | 15.4  | 7.6   | 30.4  | 9.9   | 10.8  |
| AT1G68560 | 69.5  | 31.4  | 21.4  | 39.9  | 40.4  | 13.6  | 0.1   | 1.1   | 0.1   |
| AT1G68620 | 17.4  | 42.2  | 51.5  | 31.6  | 38.6  | 48.3  | 3.1   | 6.5   | 2.5   |
| AT1G68810 | 15.1  | 20.0  | 24.3  | 14.3  | 14.7  | 20.0  | 6.0   | 11.5  | 8.5   |
| AT1G69490 | 36.3  | 353.0 | 429.8 | 94.5  | 302.5 | 396.0 | 189.6 | 29.1  | 2.3   |
| AT1G69520 | 4.0   | 0.7   | 2.1   | 1.1   | 0.9   | 0.8   | 36.3  | 13.1  | 12.0  |
| AT1G69700 | 27.1  | 2.9   | 2.3   | 17.4  | 5.0   | 3.8   | 45.7  | 33.8  | 37.9  |
| AT1G70300 | 6.9   | 11.0  | 14.3  | 11.0  | 13.4  | 11.7  | 17.9  | 63.6  | 74.2  |
| AT1G70820 | 5.6   | 12.2  | 3.8   | 5.9   | 26.0  | 1.4   | 54.0  | 146.4 | 138.7 |
| AT1G71692 | 3.1   | 0.2   | 3.1   | 3.0   | 2.1   | 2.7   | 36.4  | 6.2   | 3.3   |
| AT1G71695 | 233.0 | 70.3  | 91.4  | 94.3  | 44.8  | 31.4  | 49.0  | 281.3 | 265.4 |
| AT1G71870 | 0.6   | 1.5   | 3.3   | 1.3   | 2.8   | 1.2   | 9.3   | 10.6  | 21.3  |
| AT1G72110 | 48.5  | 15.0  | 15.9  | 18.0  | 4.5   | 9.9   | 80.5  | 118.9 | 100.7 |
| AT1G72180 | 58.9  | 97.5  | 68.1  | 43.9  | 60.5  | 30.4  | 74.6  | 17.9  | 12.9  |
| AT1G72370 | 307.3 | 186.5 | 206.9 | 271.5 | 205.4 | 128.8 | 18.5  | 53.1  | 86.9  |
| AT1G73590 | 9.2   | 5.9   | 4.9   | 5.8   | 5.4   | 2.3   | 22.5  | 11.5  | 5.8   |

|           |       |       |        |       |       |        |        |       |       |
|-----------|-------|-------|--------|-------|-------|--------|--------|-------|-------|
| AT1G73805 | 26.3  | 8.4   | 14.8   | 3.1   | 2.3   | 6.6    | 3.3    | 2.4   | 5.3   |
| AT1G73850 | 4.1   | 9.0   | 7.9    | 2.9   | 5.5   | 7.8    | 0.1    | 5.9   | 2.7   |
| AT1G74260 | 20.5  | 19.9  | 24.0   | 18.6  | 20.8  | 10.1   | 7.6    | 22.4  | 18.9  |
| AT1G74360 | 6.2   | 12.1  | 11.6   | 3.8   | 10.0  | 9.3    | 6.5    | 25.5  | 29.0  |
| AT1G74470 | 765.2 | 466.3 | 325.8  | 720.4 | 554.7 | 212.4  | 432.5  | 352.2 | 95.5  |
| AT1G74730 | 49.2  | 27.6  | 12.5   | 63.4  | 34.8  | 28.8   | 1051.9 | 234.6 | 174.3 |
| AT1G74790 | 6.2   | 7.8   | 9.9    | 9.5   | 11.2  | 8.2    | 2.9    | 22.8  | 44.7  |
| AT1G74880 | 680.1 | 449.6 | 211.5  | 429.0 | 180.3 | 203.8  | 123.4  | 101.9 | 206.3 |
| AT1G75130 | 4.3   | 1.8   | 1.5    | 6.8   | 3.3   | 2.5    | 47.1   | 21.8  | 30.0  |
| AT1G75350 | 155.8 | 107.4 | 93.1   | 203.9 | 199.5 | 211.4  | 855.2  | 273.5 | 366.0 |
| AT1G75390 | 13.8  | 3.3   | 5.8    | 4.5   | 2.9   | 3.1    | 325.0  | 106.6 | 97.9  |
| AT1G75540 | 54.6  | 77.2  | 114.4  | 84.3  | 130.0 | 156.2  | 18.2   | 35.9  | 54.9  |
| AT1G75690 | 44.2  | 29.4  | 24.6   | 68.3  | 39.8  | 28.6   | 20.3   | 28.6  | 12.3  |
| AT1G75980 | 8.8   | 7.9   | 7.9    | 12.1  | 14.2  | 12.5   | 5.1    | 19.3  | 10.6  |
| AT1G76080 | 484.7 | 320.8 | 374.6  | 516.3 | 470.3 | 172.6  | 393.6  | 688.9 | 156.1 |
| AT1G76450 | 14.2  | 13.8  | 4.8    | 22.2  | 11.4  | 6.0    | 96.9   | 179.5 | 63.0  |
| AT1G76570 | 5.2   | 10.4  | 8.5    | 17.3  | 25.6  | 35.1   | 177.2  | 47.4  | 29.5  |
| AT1G77120 | 19.8  | 22.5  | 25.8   | 13.9  | 22.3  | 11.0   | 43.3   | 130.7 | 93.0  |
| AT1G78240 | 63.0  | 113.6 | 139.6  | 85.5  | 111.1 | 114.7  | 0.9    | 2.8   | 2.4   |
| AT1G78290 | 5.2   | 3.6   | 4.9    | 9.4   | 3.1   | 5.1    | 72.8   | 62.6  | 52.9  |
| AT1G78600 | 9.2   | 11.5  | 10.4   | 8.7   | 17.0  | 10.6   | 56.2   | 205.5 | 118.1 |
| AT1G79110 | 76.4  | 45.1  | 65.3   | 60.1  | 23.9  | 45.9   | 123.9  | 62.2  | 64.2  |
| AT1G79600 | 32.1  | 88.6  | 83.8   | 60.2  | 112.3 | 53.4   | 194.6  | 73.3  | 38.7  |
| AT1G79620 | 7.0   | 2.1   | 2.0    | 1.9   | 0.3   | 0.1    | 27.3   | 44.7  | 48.5  |
| AT1G80050 | 16.7  | 5.8   | 6.0    | 10.6  | 5.0   | 6.3    | 73.8   | 105.5 | 121.8 |
| AT1G80760 | 107.2 | 6.7   | 16.1   | 61.4  | 6.6   | 5.3    | 80.4   | 65.9  | 36.2  |
| AT1G80840 | 40.3  | 39.9  | 43.5   | 28.8  | 83.4  | 112.4  | 11.2   | 37.5  | 41.4  |
| AT2G01830 | 13.8  | 1.5   | 0.8    | 13.6  | 2.9   | 1.5    | 14.9   | 12.6  | 7.9   |
| AT2G01918 | 8.8   | 3.0   | 2.1    | 8.1   | 4.4   | 4.7    | 14.0   | 11.6  | 32.4  |
| AT2G02590 | 6.7   | 7.7   | 5.5    | 3.9   | 8.9   | 10.1   | 30.2   | 9.5   | 10.8  |
| AT2G02710 | 50.9  | 325.2 | 360.5  | 97.2  | 299.7 | 314.7  | 22.9   | 55.7  | 26.8  |
| AT2G03350 | 19.5  | 13.2  | 4.8    | 12.6  | 13.5  | 8.5    | 1.0    | 2.7   | 0.4   |
| AT2G05620 | 225.1 | 125.8 | 122.1  | 352.4 | 179.3 | 199.9  | 630.5  | 110.0 | 51.1  |
| AT2G05790 | 44.4  | 7.4   | 5.3    | 25.4  | 12.6  | 4.5    | 1.1    | 3.9   | 2.1   |
| AT2G06850 | 88.1  | 17.9  | 28.4   | 85.7  | 106.8 | 74.9   | 0.0    | 4.7   | 0.0   |
| AT2G15300 | 3.1   | 3.8   | 3.5    | 3.5   | 5.3   | 1.1    | 0.2    | 1.0   | 0.4   |
| AT2G15440 | 14.8  | 2.3   | 1.6    | 4.8   | 1.6   | 1.9    | 19.1   | 26.2  | 16.6  |
| AT2G16250 | 4.5   | 2.4   | 3.1    | 3.1   | 2.5   | 1.3    | 12.1   | 38.3  | 51.9  |
| AT2G16660 | 12.5  | 4.0   | 5.0    | 10.8  | 4.5   | 5.5    | 4.5    | 23.5  | 25.7  |
| AT2G17700 | 26.0  | 34.7  | 39.2   | 28.9  | 24.2  | 35.2   | 5.0    | 39.5  | 32.2  |
| AT2G17730 | 8.6   | 3.0   | 2.8    | 3.5   | 3.3   | 1.3    | 92.7   | 92.4  | 88.8  |
| AT2G17880 | 57.3  | 431.3 | 1090.4 | 169.3 | 642.8 | 1061.4 | 263.5  | 267.7 | 114.5 |
| AT2G18540 | 0.6   | 0.9   | 2.2    | 0.4   | 0.3   | 0.3    | 3.1    | 0.4   | 0.0   |
| AT2G19590 | 0.8   | 0.1   | 0.1    | 0.4   | 0.1   | 1.2    | 1.2    | 8.1   | 9.0   |
| AT2G20670 | 13.1  | 50.2  | 106.3  | 22.5  | 67.0  | 113.7  | 24.5   | 7.7   | 2.9   |
| AT2G20680 | 11.8  | 5.3   | 4.9    | 6.8   | 2.8   | 2.8    | 0.3    | 4.4   | 1.0   |
| AT2G20900 | 6.4   | 10.6  | 6.3    | 0.8   | 2.3   | 5.0    | 77.6   | 74.0  | 69.6  |
| AT2G21300 | 5.8   | 1.6   | 1.3    | 3.1   | 1.1   | 0.3    | 16.3   | 15.8  | 13.3  |

|           |       |        |        |       |        |        |        |        |        |
|-----------|-------|--------|--------|-------|--------|--------|--------|--------|--------|
| AT2G21320 | 23.7  | 2.8    | 11.6   | 30.4  | 6.2    | 2.0    | 268.7  | 53.0   | 27.8   |
| AT2G21330 | 486.8 | 109.0  | 93.4   | 440.4 | 112.6  | 45.3   | 6736.4 | 1993.6 | 660.4  |
| AT2G21410 | 26.7  | 18.8   | 24.7   | 41.2  | 21.7   | 13.4   | 43.9   | 45.6   | 37.2   |
| AT2G21660 | 319.8 | 3346.5 | 2259.5 | 212.2 | 2190.0 | 1615.8 | 2328.8 | 8556.3 | 6665.9 |
| AT2G21790 | 24.8  | 31.6   | 31.2   | 15.2  | 27.9   | 17.6   | 0.6    | 3.0    | 6.0    |
| AT2G21960 | 14.9  | 15.8   | 3.8    | 13.9  | 10.5   | 7.1    | 93.2   | 37.6   | 47.5   |
| AT2G22125 | 45.4  | 27.5   | 28.5   | 29.8  | 26.4   | 13.4   | 2.1    | 6.3    | 4.5    |
| AT2G22240 | 7.4   | 3.5    | 5.9    | 7.6   | 3.4    | 1.6    | 165.2  | 47.6   | 29.3   |
| AT2G22420 | 20.4  | 99.9   | 62.3   | 26.5  | 78.1   | 132.3  | 36.1   | 235.0  | 373.8  |
| AT2G22540 | 206.6 | 107.3  | 119.6  | 238.0 | 135.3  | 177.6  | 150.8  | 181.6  | 191.2  |
| AT2G22810 | 0.2   | 1.0    | 0.3    | 0.1   | 3.0    | 0.3    | 0.8    | 4.6    | 4.2    |
| AT2G23290 | 4.3   | 1.4    | 0.7    | 0.9   | 0.6    | 2.3    | 49.6   | 48.6   | 35.0   |
| AT2G23380 | 3.0   | 1.4    | 0.5    | 3.1   | 1.6    | 0.7    | 2.9    | 8.3    | 5.6    |
| AT2G23790 | 5.2   | 7.5    | 5.9    | 7.6   | 8.1    | 3.5    | 110.0  | 125.5  | 125.9  |
| AT2G23810 | 23.4  | 34.4   | 51.4   | 32.4  | 70.8   | 80.6   | 173.5  | 239.0  | 295.1  |
| AT2G23840 | 12.7  | 39.5   | 30.3   | 23.7  | 44.1   | 21.6   | 95.2   | 97.5   | 32.1   |
| AT2G24120 | 9.0   | 8.1    | 11.1   | 7.6   | 8.3    | 2.9    | 2.0    | 12.8   | 9.9    |
| AT2G24150 | 6.5   | 18.1   | 23.3   | 5.5   | 16.8   | 14.1   | 5.1    | 6.2    | 0.8    |
| AT2G25737 | 5.9   | 3.4    | 2.7    | 4.2   | 2.1    | 1.5    | 49.5   | 61.1   | 21.4   |
| AT2G25770 | 2.6   | 3.2    | 2.6    | 1.2   | 1.7    | 5.2    | 193.1  | 59.3   | 22.8   |
| AT2G25810 | 24.3  | 2.3    | 2.2    | 21.8  | 4.8    | 1.0    | 231.7  | 858.1  | 308.6  |
| AT2G26695 | 34.4  | 17.5   | 7.2    | 23.4  | 45.7   | 68.5   | 24.3   | 8.8    | 10.4   |
| AT2G26710 | 3.3   | 5.4    | 9.5    | 4.8   | 9.0    | 4.3    | 16.9   | 3.9    | 1.4    |
| AT2G27500 | 38.5  | 50.2   | 56.0   | 32.3  | 48.5   | 75.6   | 8.3    | 43.3   | 38.9   |
| AT2G27810 | 14.0  | 7.1    | 5.7    | 11.5  | 12.0   | 6.5    | 0.2    | 1.9    | 1.4    |
| AT2G27830 | 41.0  | 116.5  | 137.6  | 78.7  | 68.1   | 257.0  | 81.5   | 19.2   | 18.8   |
| AT2G28120 | 4.7   | 5.8    | 4.3    | 3.2   | 8.1    | 5.0    | 64.4   | 98.8   | 84.6   |
| AT2G28250 | 18.7  | 8.2    | 8.2    | 13.4  | 9.4    | 7.5    | 6.8    | 7.9    | 3.6    |
| AT2G28470 | 34.5  | 28.4   | 32.7   | 35.0  | 31.9   | 23.8   | 48.7   | 13.0   | 0.6    |
| AT2G29130 | 28.6  | 5.3    | 4.4    | 13.2  | 3.3    | 2.4    | 12.5   | 2.0    | 0.0    |
| AT2G29630 | 123.7 | 260.2  | 141.2  | 170.2 | 237.0  | 114.4  | 4.3    | 154.4  | 112.4  |
| AT2G29650 | 23.2  | 14.6   | 27.2   | 32.9  | 26.9   | 10.3   | 109.6  | 146.1  | 67.7   |
| AT2G29980 | 142.9 | 27.1   | 23.9   | 110.9 | 35.2   | 26.3   | 3.3    | 4.5    | 3.9    |
| AT2G30490 | 121.5 | 44.3   | 106.7  | 78.5  | 32.3   | 39.5   | 96.0   | 49.0   | 31.4   |
| AT2G31160 | 9.9   | 10.2   | 8.4    | 3.5   | 7.2    | 8.8    | 0.5    | 16.8   | 3.9    |
| AT2G31810 | 40.2  | 62.4   | 69.9   | 47.6  | 74.1   | 83.8   | 6.0    | 50.9   | 38.9   |
| AT2G32150 | 48.2  | 123.9  | 257.4  | 67.0  | 154.3  | 273.5  | 10.2   | 31.5   | 4.2    |
| AT2G32290 | 4.9   | 5.6    | 4.4    | 10.7  | 7.3    | 3.3    | 85.5   | 14.9   | 12.2   |
| AT2G32500 | 3.2   | 0.9    | 0.5    | 2.9   | 1.3    | 1.4    | 24.3   | 45.6   | 6.7    |
| AT2G32530 | 18.3  | 8.1    | 9.0    | 27.5  | 11.0   | 6.2    | 68.3   | 73.0   | 71.0   |
| AT2G32850 | 24.4  | 34.5   | 34.2   | 20.3  | 26.9   | 24.3   | 51.9   | 26.9   | 22.0   |
| AT2G33210 | 25.0  | 17.8   | 19.7   | 22.7  | 20.3   | 12.6   | 11.7   | 36.4   | 52.4   |
| AT2G33570 | 36.4  | 6.1    | 4.5    | 17.2  | 7.3    | 3.1    | 5.9    | 4.5    | 1.6    |
| AT2G33735 | 16.5  | 7.9    | 9.3    | 20.8  | 14.8   | 21.4   | 8.0    | 6.6    | 1.8    |
| AT2G34680 | 6.0   | 4.3    | 3.2    | 4.0   | 4.6    | 1.8    | 0.9    | 4.2    | 3.4    |
| AT2G35120 | 16.5  | 9.3    | 20.1   | 12.4  | 6.3    | 11.2   | 13.3   | 25.2   | 28.4   |
| AT2G35130 | 10.5  | 5.4    | 2.9    | 10.0  | 8.1    | 4.0    | 7.1    | 47.0   | 32.2   |
| AT2G35710 | 8.7   | 19.5   | 16.2   | 1.5   | 18.4   | 18.1   | 12.7   | 45.7   | 37.4   |

|           |        |        |        |        |        |        |         |        |       |
|-----------|--------|--------|--------|--------|--------|--------|---------|--------|-------|
| AT2G35760 | 108.1  | 103.3  | 135.4  | 101.1  | 99.9   | 187.3  | 83.3    | 17.7   | 35.2  |
| AT2G36010 | 8.2    | 6.9    | 4.1    | 6.0    | 6.4    | 4.2    | 37.9    | 17.7   | 18.7  |
| AT2G36026 | 26.8   | 10.3   | 10.0   | 14.1   | 12.8   | 12.3   | 1.2     | 2.2    | 1.9   |
| AT2G36630 | 31.3   | 20.9   | 43.8   | 59.1   | 30.8   | 23.7   | 104.1   | 34.0   | 15.2  |
| AT2G36690 | 1.1    | 2.7    | 4.4    | 0.5    | 4.9    | 5.7    | 36.4    | 97.7   | 87.2  |
| AT2G36830 | 227.0  | 74.2   | 139.6  | 259.4  | 162.4  | 238.5  | 404.5   | 131.0  | 40.2  |
| AT2G36870 | 14.6   | 1.4    | 4.0    | 6.0    | 3.3    | 2.4    | 1.0     | 56.1   | 1.1   |
| AT2G36890 | 7.3    | 5.8    | 10.9   | 2.2    | 4.9    | 9.2    | 10.0    | 21.5   | 25.6  |
| AT2G36910 | 48.6   | 40.1   | 28.7   | 29.9   | 30.9   | 10.1   | 2.8     | 7.7    | 5.3   |
| AT2G37040 | 78.8   | 15.3   | 18.8   | 31.4   | 6.5    | 6.5    | 177.1   | 412.4  | 317.0 |
| AT2G37220 | 431.9  | 328.8  | 232.3  | 412.2  | 378.1  | 224.0  | 25.8    | 272.3  | 247.9 |
| AT2G37540 | 8.7    | 7.5    | 6.1    | 17.0   | 9.0    | 8.8    | 9.1     | 2.0    | 0.5   |
| AT2G37970 | 25.2   | 44.5   | 96.0   | 40.1   | 52.7   | 98.5   | 114.7   | 26.3   | 13.9  |
| AT2G37980 | 10.5   | 10.9   | 8.4    | 11.9   | 9.5    | 16.0   | 43.3    | 11.7   | 8.1   |
| AT2G38090 | 11.3   | 7.3    | 9.0    | 15.3   | 10.3   | 17.4   | 70.0    | 49.4   | 52.1  |
| AT2G38170 | 110.7  | 160.5  | 352.1  | 248.0  | 240.5  | 263.2  | 608.8   | 113.6  | 97.5  |
| AT2G38290 | 47.9   | 84.4   | 94.5   | 27.5   | 69.7   | 68.1   | 13.2    | 50.9   | 45.9  |
| AT2G38310 | 67.9   | 57.3   | 43.1   | 45.5   | 78.2   | 129.0  | 29.2    | 296.7  | 310.2 |
| AT2G38640 | 37.1   | 37.2   | 86.6   | 29.0   | 47.4   | 44.2   | 458.3   | 70.9   | 23.6  |
| AT2G38750 | 20.2   | 0.5    | 0.9    | 11.8   | 0.5    | 1.0    | 4.3     | 25.3   | 27.2  |
| AT2G38820 | 4.8    | 10.7   | 12.2   | 13.0   | 10.7   | 17.0   | 350.4   | 187.5  | 132.0 |
| AT2G39560 | 3.7    | 0.7    | 0.6    | 2.4    | 2.5    | 1.2    | 1.3     | 4.4    | 0.9   |
| AT2G39705 | 6.0    | 44.8   | 29.4   | 24.2   | 38.4   | 65.6   | 43.9    | 11.9   | 27.2  |
| AT2G39730 | 5314.7 | 4331.9 | 4144.2 | 7364.8 | 5302.4 | 2695.9 | 28277.3 | 4681.4 | 797.3 |
| AT2G39980 | 19.1   | 54.1   | 77.1   | 30.4   | 31.8   | 20.6   | 5.6     | 9.6    | 8.2   |
| AT2G40540 | 62.5   | 54.8   | 37.5   | 52.4   | 51.8   | 21.0   | 93.3    | 56.1   | 34.5  |
| AT2G40610 | 124.1  | 90.4   | 63.2   | 241.4  | 173.0  | 114.3  | 0.7     | 176.3  | 15.6  |
| AT2G40900 | 11.7   | 23.5   | 23.7   | 15.8   | 17.8   | 24.1   | 113.3   | 62.2   | 59.7  |
| AT2G41050 | 4.5    | 3.8    | 6.7    | 13.4   | 11.2   | 4.2    | 57.4    | 25.1   | 3.4   |
| AT2G41120 | 6.8    | 2.4    | 4.3    | 10.9   | 4.7    | 1.3    | 33.1    | 28.0   | 6.8   |
| AT2G41250 | 334.4  | 112.3  | 274.5  | 249.0  | 70.5   | 44.0   | 28.3    | 11.2   | 9.7   |
| AT2G41290 | 3.1    | 5.5    | 4.8    | 5.2    | 6.1    | 9.2    | 0.9     | 1.9    | 0.2   |
| AT2G41940 | 373.4  | 78.5   | 72.6   | 326.2  | 109.1  | 116.4  | 18.2    | 46.3   | 36.0  |
| AT2G41950 | 12.6   | 5.6    | 4.5    | 20.3   | 11.3   | 12.4   | 21.7    | 8.0    | 9.1   |
| AT2G42750 | 72.7   | 150.6  | 155.6  | 92.7   | 109.1  | 52.5   | 243.9   | 98.8   | 33.9  |
| AT2G42910 | 69.3   | 73.5   | 72.0   | 44.7   | 50.5   | 24.4   | 9.7     | 32.0   | 53.9  |
| AT2G43010 | 45.3   | 93.2   | 87.0   | 95.0   | 126.6  | 103.1  | 201.3   | 182.5  | 157.0 |
| AT2G44670 | 167.8  | 168.8  | 134.0  | 320.3  | 241.3  | 772.7  | 148.5   | 294.0  | 408.2 |
| AT2G45160 | 4.8    | 1.9    | 2.0    | 7.5    | 3.0    | 4.9    | 75.0    | 55.2   | 45.5  |
| AT2G45470 | 239.4  | 51.7   | 41.8   | 153.1  | 65.8   | 43.4   | 0.5     | 2.7    | 1.0   |
| AT2G46270 | 39.4   | 18.8   | 24.1   | 33.7   | 24.2   | 26.2   | 38.7    | 22.2   | 16.1  |
| AT2G46600 | 231.3  | 205.9  | 473.5  | 416.5  | 243.8  | 554.8  | 212.5   | 70.5   | 106.9 |
| AT2G46680 | 25.4   | 47.2   | 96.8   | 19.4   | 33.9   | 47.7   | 193.5   | 75.4   | 42.3  |
| AT2G46790 | 6.3    | 11.7   | 46.3   | 9.7    | 10.0   | 0.7    | 62.7    | 176.9  | 39.6  |
| AT2G46820 | 441.7  | 388.7  | 217.2  | 557.6  | 404.1  | 236.2  | 92.9    | 187.1  | 149.9 |
| AT2G46940 | 23.2   | 10.3   | 13.1   | 30.7   | 13.9   | 21.2   | 7.2     | 2.0    | 0.7   |
| AT2G47240 | 218.7  | 70.1   | 77.9   | 198.7  | 61.4   | 71.6   | 16.3    | 57.3   | 73.1  |
| AT2G47460 | 9.6    | 4.3    | 4.3    | 4.6    | 6.0    | 4.1    | 5.4     | 5.7    | 0.5   |

|           |        |        |        |        |        |         |         |         |         |
|-----------|--------|--------|--------|--------|--------|---------|---------|---------|---------|
| AT3G01060 | 54.7   | 38.7   | 56.6   | 53.7   | 22.4   | 9.2     | 132.0   | 35.6    | 14.1    |
| AT3G01420 | 71.6   | 32.4   | 23.6   | 86.2   | 38.8   | 58.2    | 108.2   | 161.4   | 75.2    |
| AT3G01440 | 71.7   | 83.8   | 35.3   | 118.4  | 106.0  | 94.8    | 0.3     | 2.3     | 4.0     |
| AT3G01470 | 318.6  | 553.1  | 573.9  | 434.8  | 423.4  | 793.9   | 966.9   | 773.6   | 798.6   |
| AT3G01660 | 32.2   | 17.0   | 8.4    | 31.2   | 16.3   | 16.0    | 18.9    | 6.6     | 8.3     |
| AT3G01990 | 37.9   | 84.9   | 47.3   | 40.3   | 62.7   | 35.6    | 36.6    | 96.0    | 69.2    |
| AT3G02040 | 7.2    | 10.1   | 6.7    | 9.3    | 10.8   | 31.9    | 17.6    | 29.8    | 82.6    |
| AT3G02380 | 260.3  | 60.5   | 155.5  | 494.2  | 68.1   | 131.6   | 154.4   | 29.9    | 6.1     |
| AT3G03050 | 6.3    | 11.0   | 14.3   | 4.5    | 9.6    | 3.2     | 5.4     | 17.7    | 19.0    |
| AT3G03150 | 117.8  | 173.2  | 215.3  | 364.7  | 344.3  | 623.5   | 322.0   | 479.6   | 981.9   |
| AT3G03710 | 21.7   | 19.4   | 23.2   | 20.6   | 26.2   | 13.1    | 6.7     | 10.3    | 21.3    |
| AT3G04600 | 43.4   | 25.5   | 32.5   | 35.5   | 38.7   | 33.6    | 15.0    | 37.6    | 40.9    |
| AT3G05510 | 3.3    | 4.6    | 5.8    | 3.9    | 9.6    | 10.8    | 10.2    | 27.9    | 24.3    |
| AT3G05690 | 30.0   | 22.4   | 21.6   | 33.5   | 20.8   | 12.4    | 14.5    | 7.3     | 8.3     |
| AT3G05890 | 105.3  | 31.5   | 32.6   | 50.4   | 26.9   | 18.1    | 35.1    | 21.4    | 8.5     |
| AT3G06390 | 6.1    | 1.6    | 1.2    | 0.2    | 1.1    | 0.7     | 3.7     | 12.2    | 18.8    |
| AT3G06730 | 28.2   | 13.7   | 12.0   | 33.0   | 16.7   | 19.2    | 7.0     | 11.4    | 26.8    |
| AT3G06868 | 84.3   | 64.7   | 56.1   | 66.9   | 51.1   | 25.8    | 1.6     | 1.4     | 0.5     |
| AT3G07050 | 60.6   | 38.7   | 63.6   | 43.6   | 40.7   | 34.3    | 6.5     | 17.4    | 21.8    |
| AT3G07340 | 3.2    | 0.8    | 1.6    | 2.8    | 1.8    | 1.6     | 41.6    | 78.3    | 35.8    |
| AT3G07390 | 378.2  | 250.8  | 117.6  | 127.7  | 201.0  | 105.5   | 66.7    | 63.4    | 93.1    |
| AT3G07650 | 65.5   | 165.3  | 165.6  | 118.9  | 158.2  | 256.3   | 17.9    | 32.7    | 87.4    |
| AT3G07700 | 15.8   | 38.7   | 55.8   | 33.0   | 43.1   | 47.0    | 86.7    | 20.2    | 5.8     |
| AT3G08570 | 8.0    | 3.7    | 3.0    | 5.8    | 4.6    | 3.4     | 12.5    | 2.1     | 0.2     |
| AT3G09085 | 6.8    | 16.0   | 22.1   | 34.9   | 36.8   | 101.2   | 0.1     | 2.4     | 0.7     |
| AT3G09430 | 2.5    | 2.6    | 2.8    | 3.9    | 3.2    | 0.7     | 12.5    | 2.7     | 1.0     |
| AT3G10040 | 8.9    | 14.8   | 12.6   | 6.3    | 7.2    | 5.1     | 5.4     | 24.7    | 25.3    |
| AT3G10050 | 125.6  | 46.3   | 43.9   | 87.5   | 65.1   | 33.3    | 6.2     | 37.7    | 39.5    |
| AT3G10960 | 14.7   | 36.9   | 42.5   | 12.4   | 20.7   | 17.7    | 99.3    | 36.2    | 22.2    |
| AT3G10985 | 88.0   | 172.8  | 143.7  | 195.8  | 215.1  | 371.1   | 173.8   | 167.9   | 74.3    |
| AT3G11110 | 3.2    | 50.3   | 16.8   | 6.2    | 104.2  | 35.9    | 23.2    | 72.6    | 57.0    |
| AT3G11600 | 8.8    | 2.6    | 16.6   | 8.4    | 3.6    | 5.7     | 87.9    | 53.7    | 26.5    |
| AT3G11750 | 62.0   | 27.7   | 25.2   | 46.2   | 28.3   | 40.6    | 34.3    | 85.4    | 31.6    |
| AT3G12090 | 13.9   | 23.5   | 15.4   | 17.5   | 17.8   | 30.4    | 15.6    | 27.7    | 16.0    |
| AT3G12120 | 583.7  | 562.2  | 527.8  | 454.2  | 573.9  | 381.6   | 49.5    | 131.5   | 42.4    |
| AT3G12145 | 157.0  | 5.6    | 12.3   | 28.7   | 2.1    | 2.7     | 0.1     | 10.6    | 2.5     |
| AT3G12610 | 82.4   | 26.6   | 15.9   | 94.8   | 70.7   | 40.9    | 4.3     | 9.1     | 1.4     |
| AT3G12710 | 68.1   | 29.0   | 36.6   | 56.8   | 43.2   | 41.8    | 0.0     | 2.7     | 0.1     |
| AT3G13080 | 27.5   | 18.9   | 30.3   | 6.0    | 11.3   | 9.2     | 7.0     | 29.5    | 33.2    |
| AT3G13120 | 325.9  | 238.3  | 157.0  | 331.6  | 243.4  | 198.0   | 113.8   | 44.0    | 77.5    |
| AT3G13750 | 73.8   | 485.3  | 1010.0 | 173.7  | 460.0  | 477.3   | 2.6     | 18.7    | 2.7     |
| AT3G14570 | 2.3    | 1.7    | 1.6    | 1.3    | 0.7    | 0.1     | 0.1     | 1.0     | 0.4     |
| AT3G14770 | 10.7   | 8.1    | 9.5    | 27.7   | 10.0   | 23.4    | 89.5    | 32.5    | 35.6    |
| AT3G14920 | 37.7   | 24.8   | 28.0   | 20.4   | 20.8   | 13.4    | 4.4     | 8.1     | 2.3     |
| AT3G15353 | 2555.2 | 5435.4 | 4989.5 | 3176.8 | 7032.5 | 13852.9 | 34416.3 | 10373.5 | 11018.9 |
| AT3G15450 | 103.3  | 2162.4 | 2401.3 | 246.0  | 1670.6 | 2240.9  | 43.7    | 391.8   | 247.2   |
| AT3G15840 | 80.4   | 269.7  | 151.1  | 177.7  | 414.6  | 263.2   | 212.0   | 1168.2  | 714.5   |
| AT3G16240 | 207.0  | 24.4   | 54.9   | 261.8  | 370.7  | 219.9   | 33.6    | 68.9    | 15.4    |

|           |        |         |         |        |         |         |        |        |        |
|-----------|--------|---------|---------|--------|---------|---------|--------|--------|--------|
| AT3G16250 | 140.6  | 88.7    | 48.1    | 130.1  | 110.9   | 117.4   | 7.3    | 187.6  | 297.1  |
| AT3G17020 | 168.4  | 137.7   | 127.4   | 253.0  | 226.1   | 265.0   | 107.0  | 106.8  | 140.4  |
| AT3G18390 | 79.1   | 66.3    | 69.6    | 79.4   | 70.8    | 42.1    | 5.6    | 34.7   | 23.5   |
| AT3G19270 | 16.2   | 4.1     | 17.1    | 20.3   | 3.9     | 1.1     | 13.4   | 2.2    | 0.6    |
| AT3G19450 | 59.2   | 27.3    | 30.3    | 45.8   | 29.4    | 23.9    | 16.7   | 9.3    | 22.9   |
| AT3G19720 | 42.9   | 34.7    | 40.4    | 72.5   | 35.6    | 38.8    | 0.6    | 3.5    | 7.5    |
| AT3G20570 | 145.1  | 100.1   | 120.6   | 125.5  | 66.0    | 83.0    | 8.0    | 3.3    | 0.6    |
| AT3G20810 | 3.0    | 6.0     | 9.4     | 5.5    | 8.6     | 17.9    | 6.1    | 21.9   | 23.4   |
| AT3G21180 | 12.5   | 17.5    | 17.7    | 15.7   | 13.8    | 5.4     | 60.7   | 72.7   | 67.3   |
| AT3G21250 | 9.3    | 4.7     | 3.5     | 7.5    | 3.6     | 1.5     | 52.3   | 17.4   | 17.7   |
| AT3G21330 | 2.0    | 18.8    | 2.5     | 2.4    | 28.6    | 2.0     | 4.6    | 20.7   | 8.2    |
| AT3G21420 | 5.7    | 2.6     | 2.9     | 2.6    | 1.0     | 2.5     | 9.4    | 8.1    | 3.4    |
| AT3G21560 | 51.0   | 30.1    | 45.9    | 57.3   | 25.7    | 21.1    | 554.4  | 74.0   | 45.2   |
| AT3G21690 | 54.3   | 70.6    | 87.3    | 69.2   | 77.0    | 75.1    | 288.6  | 103.5  | 98.0   |
| AT3G22530 | 34.7   | 49.8    | 64.2    | 84.0   | 103.5   | 149.9   | 16.1   | 13.3   | 6.1    |
| AT3G22740 | 7.3    | 0.4     | 1.6     | 12.4   | 0.2     | 0.4     | 0.0    | 2.1    | 1.2    |
| AT3G22840 | 65.6   | 18.2    | 77.3    | 48.0   | 8.1     | 4.1     | 1613.9 | 188.6  | 76.8   |
| AT3G22880 | 13.8   | 53.8    | 35.2    | 8.9    | 74.4    | 83.6    | 17.0   | 5.7    | 3.9    |
| AT3G23430 | 3.0    | 3.2     | 2.6     | 3.6    | 1.3     | 1.0     | 0.1    | 1.6    | 1.3    |
| AT3G23580 | 4.3    | 1.5     | 4.1     | 3.8    | 3.9     | 5.6     | 0.1    | 1.8    | 3.5    |
| AT3G23730 | 31.0   | 11.7    | 10.4    | 18.0   | 32.6    | 25.5    | 6.0    | 86.4   | 25.4   |
| AT3G23740 | 2.4    | 1.5     | 1.3     | 1.5    | 0.4     | 0.3     | 3.3    | 0.7    | 0.2    |
| AT3G23820 | 381.5  | 200.4   | 201.2   | 279.7  | 224.6   | 143.0   | 6.1    | 15.3   | 8.9    |
| AT3G23920 | 83.1   | 64.4    | 119.6   | 94.0   | 73.7    | 52.1    | 165.9  | 32.9   | 17.7   |
| AT3G23940 | 47.6   | 22.5    | 22.0    | 36.4   | 27.1    | 10.4    | 6.2    | 20.3   | 28.0   |
| AT3G24190 | 52.0   | 32.7    | 44.7    | 52.3   | 23.4    | 12.7    | 355.4  | 84.9   | 51.5   |
| AT3G24420 | 40.4   | 127.9   | 118.8   | 88.2   | 42.9    | 102.1   | 8.6    | 4.0    | 5.3    |
| AT3G24460 | 3.7    | 6.6     | 10.0    | 9.2    | 13.0    | 13.2    | 185.0  | 26.7   | 9.9    |
| AT3G25070 | 178.0  | 120.0   | 123.9   | 141.0  | 128.2   | 157.3   | 139.0  | 275.8  | 359.6  |
| AT3G25660 | 32.5   | 23.2    | 18.6    | 19.0   | 18.4    | 5.1     | 16.7   | 17.0   | 36.3   |
| AT3G26540 | 5.5    | 5.3     | 6.0     | 1.3    | 2.7     | 1.8     | 0.0    | 2.4    | 2.4    |
| AT3G26740 | 4427.9 | 21464.9 | 17357.3 | 5224.9 | 13938.5 | 17458.0 | 320.9  | 3600.5 | 2433.4 |
| AT3G26932 | 22.7   | 11.7    | 19.5    | 19.5   | 9.0     | 15.6    | 2.7    | 13.1   | 30.7   |
| AT3G27250 | 35.5   | 24.6    | 27.0    | 53.0   | 18.2    | 12.9    | 11.0   | 2.3    | 0.1    |
| AT3G27830 | 1652.3 | 942.8   | 643.2   | 810.6  | 696.3   | 594.6   | 7.8    | 4.9    | 14.8   |
| AT3G28510 | 172.7  | 60.4    | 98.1    | 26.9   | 36.0    | 54.9    | 14.4   | 39.9   | 24.8   |
| AT3G28960 | 0.9    | 1.7     | 5.0     | 2.8    | 1.8     | 2.2     | 60.2   | 25.8   | 22.0   |
| AT3G29240 | 534.1  | 810.5   | 777.5   | 535.7  | 749.6   | 1106.7  | 804.7  | 140.2  | 96.6   |
| AT3G29320 | 45.4   | 51.8    | 30.3    | 27.8   | 44.3    | 16.0    | 1.6    | 9.7    | 9.8    |
| AT3G30180 | 36.4   | 34.8    | 19.5    | 73.0   | 43.9    | 32.2    | 7.0    | 4.2    | 1.8    |
| AT3G30390 | 46.2   | 53.2    | 55.9    | 84.2   | 93.0    | 90.8    | 200.3  | 214.6  | 154.2  |
| AT3G30775 | 22.4   | 152.4   | 219.8   | 24.6   | 138.9   | 211.0   | 129.3  | 37.4   | 30.0   |
| AT3G43790 | 21.0   | 42.1    | 43.0    | 27.4   | 53.4    | 54.8    | 139.7  | 81.6   | 83.1   |
| AT3G44350 | 25.6   | 14.6    | 15.7    | 8.4    | 15.0    | 12.6    | 3.7    | 13.7   | 22.6   |
| AT3G45050 | 9.3    | 8.6     | 3.3     | 19.2   | 15.6    | 13.1    | 39.7   | 31.4   | 66.0   |
| AT3G45090 | 4.1    | 2.0     | 1.6     | 2.8    | 0.9     | 1.1     | 0.4    | 1.9    | 3.2    |
| AT3G45140 | 1445.5 | 297.4   | 505.9   | 700.1  | 78.1    | 53.5    | 279.8  | 125.4  | 31.1   |
| AT3G46130 | 5.7    | 5.1     | 15.8    | 17.5   | 9.8     | 11.0    | 72.9   | 116.6  | 158.0  |

|           |        |        |        |        |        |        |        |        |        |
|-----------|--------|--------|--------|--------|--------|--------|--------|--------|--------|
| AT3G46640 | 17.1   | 60.4   | 66.0   | 34.3   | 70.2   | 104.4  | 20.7   | 87.3   | 70.7   |
| AT3G47160 | 34.9   | 131.3  | 89.3   | 43.9   | 121.6  | 91.7   | 87.7   | 109.7  | 76.2   |
| AT3G47470 | 2427.4 | 2383.4 | 1255.5 | 3962.0 | 3288.5 | 830.9  | 1487.7 | 2309.8 | 245.4  |
| AT3G47570 | 1.3    | 4.6    | 1.2    | 2.1    | 3.0    | 2.2    | 3.6    | 7.9    | 7.0    |
| AT3G48360 | 1.1    | 1.4    | 3.7    | 1.6    | 5.0    | 9.3    | 107.6  | 140.0  | 56.1   |
| AT3G48530 | 106.2  | 183.1  | 261.3  | 228.0  | 252.5  | 396.4  | 24.2   | 96.4   | 75.9   |
| AT3G48850 | 1.5    | 1.0    | 2.3    | 0.1    | 0.7    | 11.2   | 9.3    | 2.6    | 3.4    |
| AT3G50040 | 2.1    | 4.9    | 4.5    | 2.3    | 5.5    | 5.3    | 49.2   | 32.0   | 33.1   |
| AT3G51470 | 3.3    | 0.6    | 1.0    | 3.0    | 1.2    | 0.5    | 8.6    | 34.4   | 31.7   |
| AT3G51550 | 127.0  | 95.2   | 103.9  | 96.5   | 94.1   | 62.8   | 13.6   | 33.9   | 31.7   |
| AT3G51895 | 11.4   | 4.1    | 1.7    | 10.3   | 4.0    | 7.7    | 247.2  | 84.6   | 73.4   |
| AT3G52150 | 159.2  | 67.6   | 48.0   | 163.4  | 107.6  | 67.6   | 10.0   | 16.6   | 49.7   |
| AT3G52190 | 32.1   | 26.6   | 22.5   | 37.2   | 24.1   | 19.8   | 22.1   | 61.3   | 83.4   |
| AT3G52490 | 11.4   | 8.8    | 7.6    | 7.9    | 5.8    | 4.6    | 9.2    | 5.1    | 4.5    |
| AT3G52870 | 133.6  | 75.0   | 63.1   | 97.5   | 37.3   | 34.4   | 37.2   | 10.7   | 8.8    |
| AT3G53830 | 4.7    | 2.7    | 10.7   | 2.7    | 4.1    | 0.9    | 34.8   | 6.1    | 2.0    |
| AT3G53980 | 646.0  | 286.2  | 170.2  | 511.9  | 475.2  | 312.4  | 91.3   | 100.1  | 49.4   |
| AT3G54000 | 31.7   | 37.1   | 35.2   | 20.8   | 37.2   | 29.8   | 139.5  | 54.8   | 53.1   |
| AT3G54050 | 445.3  | 377.5  | 257.6  | 535.8  | 408.5  | 229.7  | 945.6  | 304.6  | 356.0  |
| AT3G54500 | 205.8  | 95.3   | 175.2  | 212.6  | 116.7  | 39.3   | 81.6   | 13.4   | 3.0    |
| AT3G54890 | 2637.4 | 2622.0 | 918.8  | 3220.9 | 3260.9 | 1701.0 | 1448.3 | 3513.7 | 636.9  |
| AT3G55010 | 4.5    | 2.1    | 2.7    | 4.5    | 3.7    | 3.4    | 7.2    | 23.3   | 40.0   |
| AT3G55120 | 24.1   | 13.0   | 13.8   | 25.5   | 12.2   | 12.9   | 27.0   | 41.8   | 15.0   |
| AT3G55560 | 11.0   | 22.4   | 26.6   | 12.0   | 30.3   | 47.0   | 11.0   | 36.2   | 53.9   |
| AT3G56290 | 29.3   | 6.2    | 12.3   | 55.1   | 11.3   | 6.7    | 405.8  | 44.4   | 3.1    |
| AT3G56370 | 20.9   | 3.7    | 4.4    | 9.7    | 4.9    | 2.7    | 1.7    | 0.9    | 0.6    |
| AT3G57150 | 78.1   | 54.5   | 76.7   | 49.0   | 53.6   | 36.7   | 14.2   | 36.0   | 35.2   |
| AT3G57240 | 92.2   | 67.5   | 73.0   | 31.6   | 58.2   | 68.3   | 59.9   | 378.5  | 92.3   |
| AT3G57520 | 54.9   | 161.4  | 263.7  | 119.4  | 186.2  | 511.8  | 853.7  | 281.7  | 318.8  |
| AT3G57610 | 48.0   | 31.0   | 28.0   | 50.0   | 41.0   | 29.0   | 33.7   | 58.1   | 82.1   |
| AT3G58060 | 1.6    | 0.6    | 0.5    | 1.9    | 0.4    | 0.5    | 105.1  | 19.9   | 13.5   |
| AT3G59400 | 835.4  | 355.6  | 217.0  | 632.5  | 244.1  | 116.2  | 83.6   | 44.2   | 12.8   |
| AT3G59420 | 7.0    | 3.1    | 4.4    | 8.1    | 5.5    | 5.1    | 0.2    | 0.5    | 0.1    |
| AT3G59780 | 61.3   | 55.4   | 36.1   | 65.4   | 66.6   | 27.2   | 181.5  | 86.9   | 31.1   |
| AT3G61470 | 2095.5 | 1989.3 | 1222.5 | 3205.3 | 2988.3 | 1513.7 | 1600.3 | 1327.5 | 261.6  |
| AT3G61770 | 7.6    | 4.5    | 4.4    | 7.4    | 8.0    | 4.4    | 45.5   | 14.0   | 30.7   |
| AT3G62110 | 3.8    | 3.0    | 1.1    | 5.4    | 7.2    | 4.5    | 8.8    | 14.7   | 24.5   |
| AT3G62420 | 82.8   | 136.9  | 151.3  | 84.1   | 155.0  | 177.6  | 430.6  | 198.0  | 134.9  |
| AT3G62550 | 318.1  | 866.7  | 460.8  | 457.1  | 778.2  | 1664.6 | 2141.6 | 6621.6 | 5278.7 |
| AT3G62720 | 11.6   | 7.5    | 6.6    | 8.8    | 20.4   | 9.2    | 2.2    | 16.2   | 10.6   |
| AT3G63120 | 59.2   | 26.0   | 27.7   | 36.9   | 25.6   | 23.3   | 2.8    | 11.1   | 5.9    |
| AT3G63520 | 137.8  | 171.1  | 174.6  | 171.6  | 157.1  | 127.5  | 339.3  | 115.9  | 82.3   |
| AT4G02280 | 3.8    | 9.1    | 17.8   | 16.3   | 14.9   | 7.4    | 35.4   | 218.2  | 141.4  |
| AT4G02780 | 1.1    | 3.7    | 3.1    | 1.8    | 3.6    | 4.2    | 13.3   | 12.1   | 4.3    |
| AT4G04020 | 56.4   | 77.0   | 151.6  | 213.7  | 168.5  | 181.5  | 738.2  | 251.3  | 168.4  |
| AT4G05190 | 2.5    | 0.4    | 0.4    | 1.3    | 0.4    | 0.2    | 6.7    | 28.2   | 36.1   |
| AT4G07960 | 5.5    | 3.9    | 3.3    | 4.9    | 2.4    | 1.3    | 5.1    | 11.6   | 5.8    |
| AT4G09010 | 51.1   | 74.6   | 17.2   | 40.4   | 51.9   | 13.8   | 7.2    | 34.7   | 22.5   |

|           |        |        |        |        |        |        |        |       |       |
|-----------|--------|--------|--------|--------|--------|--------|--------|-------|-------|
| AT4G09350 | 27.7   | 5.8    | 12.1   | 85.1   | 15.1   | 17.7   | 849.1  | 213.4 | 154.7 |
| AT4G09620 | 7.7    | 2.4    | 3.0    | 10.3   | 5.7    | 5.4    | 97.3   | 25.3  | 21.5  |
| AT4G10310 | 4.7    | 5.5    | 7.2    | 5.2    | 7.7    | 6.7    | 18.5   | 5.1   | 2.6   |
| AT4G10340 | 4194.5 | 2457.5 | 1472.0 | 5538.8 | 2938.0 | 1424.3 | 1084.1 | 384.1 | 14.0  |
| AT4G10770 | 3.1    | 11.5   | 9.6    | 5.2    | 10.6   | 6.9    | 48.2   | 66.9  | 63.7  |
| AT4G11910 | 0.5    | 0.3    | 1.5    | 1.4    | 5.7    | 6.2    | 162.3  | 25.1  | 5.4   |
| AT4G12300 | 37.5   | 16.3   | 16.4   | 84.4   | 18.3   | 29.8   | 86.6   | 52.1  | 15.9  |
| AT4G12730 | 203.0  | 134.5  | 139.7  | 103.1  | 144.5  | 84.1   | 7.5    | 13.2  | 6.3   |
| AT4G13010 | 12.4   | 5.7    | 7.0    | 17.4   | 12.0   | 7.7    | 33.7   | 8.0   | 6.2   |
| AT4G13040 | 27.1   | 13.5   | 11.0   | 19.7   | 11.4   | 14.9   | 202.1  | 43.1  | 26.3  |
| AT4G14750 | 7.8    | 1.5    | 0.8    | 3.5    | 1.4    | 0.1    | 6.2    | 1.1   | 0.3   |
| AT4G15440 | 31.4   | 9.7    | 5.1    | 14.9   | 11.1   | 0.9    | 89.9   | 15.8  | 12.4  |
| AT4G15510 | 126.5  | 64.0   | 33.0   | 101.8  | 59.3   | 40.8   | 7.0    | 8.7   | 18.6  |
| AT4G15530 | 30.8   | 123.6  | 434.6  | 55.0   | 128.2  | 201.2  | 403.6  | 126.6 | 77.1  |
| AT4G16146 | 81.2   | 149.2  | 111.5  | 60.3   | 141.9  | 103.1  | 66.5   | 23.4  | 18.7  |
| AT4G16563 | 22.0   | 309.0  | 293.4  | 50.4   | 202.6  | 145.5  | 3.6    | 0.5   | 0.1   |
| AT4G17180 | 6.6    | 4.5    | 2.4    | 3.4    | 3.5    | 1.2    | 2.9    | 1.2   | 0.6   |
| AT4G17260 | 45.3   | 75.5   | 61.4   | 16.1   | 28.3   | 23.0   | 6.6    | 21.6  | 23.4  |
| AT4G17560 | 71.1   | 23.2   | 11.0   | 98.6   | 42.0   | 36.3   | 89.9   | 33.3  | 53.1  |
| AT4G18290 | 1.5    | 4.8    | 3.2    | 5.8    | 8.4    | 8.5    | 18.5   | 8.4   | 8.2   |
| AT4G18640 | 14.4   | 4.8    | 5.8    | 8.4    | 3.6    | 2.2    | 16.4   | 70.1  | 54.9  |
| AT4G18750 | 2.4    | 1.7    | 1.7    | 1.3    | 1.4    | 0.3    | 2.1    | 3.7   | 7.5   |
| AT4G18780 | 3.5    | 2.4    | 2.4    | 2.1    | 0.6    | 0.8    | 2.2    | 3.5   | 1.0   |
| AT4G18810 | 65.6   | 50.6   | 64.6   | 102.7  | 54.1   | 12.9   | 105.7  | 36.9  | 20.2  |
| AT4G19170 | 383.8  | 1435.3 | 1299.5 | 451.2  | 895.4  | 233.2  | 780.0  | 123.3 | 18.8  |
| AT4G19230 | 0.7    | 5.6    | 7.4    | 1.1    | 9.6    | 3.6    | 16.3   | 50.1  | 47.4  |
| AT4G21320 | 1.7    | 5.4    | 3.9    | 3.3    | 4.4    | 4.7    | 8.0    | 2.0   | 1.3   |
| AT4G21445 | 26.7   | 26.6   | 11.5   | 36.6   | 34.1   | 33.2   | 12.4   | 61.8  | 86.4  |
| AT4G21870 | 7.9    | 10.9   | 10.4   | 22.9   | 25.2   | 42.8   | 28.8   | 149.7 | 83.9  |
| AT4G22010 | 4.8    | 2.2    | 0.5    | 10.1   | 2.6    | 0.5    | 0.2    | 1.6   | 0.2   |
| AT4G22580 | 17.5   | 5.9    | 5.5    | 9.8    | 6.5    | 4.0    | 10.3   | 2.6   | 3.1   |
| AT4G24120 | 61.9   | 88.2   | 82.7   | 57.5   | 68.0   | 68.7   | 30.6   | 63.7  | 41.0  |
| AT4G24220 | 96.2   | 166.2  | 207.3  | 117.7  | 188.0  | 179.4  | 89.9   | 25.3  | 18.0  |
| AT4G24380 | 16.4   | 3.6    | 5.0    | 17.7   | 5.1    | 9.6    | 486.6  | 95.7  | 46.8  |
| AT4G24590 | 27.5   | 33.7   | 39.3   | 38.4   | 39.4   | 84.9   | 103.0  | 81.3  | 84.0  |
| AT4G24660 | 11.0   | 9.5    | 3.1    | 12.3   | 11.2   | 7.8    | 11.6   | 9.6   | 11.1  |
| AT4G25290 | 26.8   | 6.8    | 15.4   | 35.9   | 9.8    | 3.9    | 29.3   | 10.0  | 3.3   |
| AT4G25500 | 391.5  | 384.0  | 516.2  | 327.8  | 305.0  | 331.1  | 59.3   | 241.0 | 111.5 |
| AT4G25630 | 65.0   | 40.3   | 59.9   | 83.6   | 70.2   | 76.3   | 31.2   | 92.3  | 166.0 |
| AT4G25700 | 36.4   | 14.4   | 15.1   | 73.7   | 29.7   | 22.7   | 119.3  | 38.3  | 26.1  |
| AT4G25940 | 13.1   | 42.2   | 44.2   | 9.0    | 25.8   | 31.4   | 6.1    | 2.2   | 1.2   |
| AT4G26130 | 73.4   | 114.0  | 102.8  | 51.7   | 118.6  | 39.3   | 87.5   | 13.1  | 3.7   |
| AT4G26760 | 21.9   | 10.3   | 7.5    | 9.6    | 6.7    | 5.0    | 7.1    | 7.3   | 13.3  |
| AT4G27280 | 68.9   | 40.6   | 29.5   | 30.2   | 76.9   | 114.0  | 53.6   | 19.1  | 12.0  |
| AT4G27310 | 15.5   | 31.4   | 29.1   | 25.2   | 46.5   | 14.6   | 90.4   | 15.8  | 5.0   |
| AT4G27350 | 0.3    | 2.4    | 4.6    | 2.6    | 4.0    | 2.4    | 47.4   | 8.8   | 3.3   |
| AT4G27440 | 1076.2 | 433.9  | 198.8  | 661.7  | 412.5  | 160.9  | 0.6    | 48.7  | 11.8  |
| AT4G27860 | 0.8    | 0.3    | 0.5    | 6.0    | 0.9    | 1.2    | 27.1   | 19.3  | 8.3   |

|           |       |       |       |       |       |        |        |       |       |
|-----------|-------|-------|-------|-------|-------|--------|--------|-------|-------|
| AT4G28040 | 50.8  | 37.8  | 120.2 | 65.3  | 69.6  | 139.8  | 40.3   | 16.7  | 4.4   |
| AT4G28660 | 50.4  | 23.7  | 9.0   | 42.4  | 31.9  | 17.3   | 72.2   | 26.6  | 13.6  |
| AT4G29310 | 5.3   | 1.0   | 0.4   | 5.3   | 1.2   | 1.0    | 1.2    | 2.1   | 0.0   |
| AT4G29780 | 33.3  | 8.6   | 7.0   | 17.8  | 27.6  | 15.9   | 139.2  | 45.1  | 24.6  |
| AT4G30810 | 122.0 | 49.2  | 48.5  | 139.0 | 65.3  | 38.0   | 11.2   | 46.9  | 35.3  |
| AT4G30960 | 489.6 | 270.1 | 392.4 | 308.6 | 201.9 | 247.2  | 48.7   | 24.6  | 27.2  |
| AT4G31120 | 33.9  | 35.8  | 33.4  | 48.2  | 60.4  | 73.0   | 3.3    | 8.2   | 9.1   |
| AT4G31380 | 2.4   | 215.3 | 24.5  | 19.2  | 118.4 | 29.4   | 12.4   | 20.6  | 38.8  |
| AT4G32190 | 36.4  | 36.0  | 59.8  | 46.4  | 41.1  | 24.0   | 28.0   | 10.6  | 12.6  |
| AT4G32890 | 5.9   | 2.9   | 3.5   | 4.8   | 6.9   | 4.7    | 2.0    | 5.2   | 1.9   |
| AT4G33040 | 60.5  | 38.5  | 18.4  | 120.8 | 59.9  | 75.0   | 276.3  | 66.6  | 34.6  |
| AT4G33160 | 6.2   | 1.6   | 2.4   | 4.3   | 2.2   | 3.5    | 19.0   | 3.1   | 3.5   |
| AT4G33420 | 27.6  | 31.9  | 40.6  | 25.4  | 52.7  | 54.4   | 10.1   | 19.9  | 40.4  |
| AT4G34880 | 8.8   | 2.1   | 1.7   | 4.8   | 3.0   | 1.6    | 2.9    | 4.2   | 8.5   |
| AT4G35770 | 1.6   | 198.3 | 353.7 | 112.9 | 468.6 | 1563.1 | 0.2    | 6.0   | 1.4   |
| AT4G35790 | 63.1  | 147.0 | 118.5 | 65.5  | 146.7 | 81.0   | 9.8    | 10.9  | 6.2   |
| AT4G36250 | 156.7 | 74.3  | 55.8  | 172.5 | 106.8 | 105.2  | 6.5    | 8.3   | 2.2   |
| AT4G38540 | 1.4   | 6.8   | 10.5  | 1.5   | 9.8   | 27.9   | 16.6   | 18.6  | 10.6  |
| AT4G38890 | 7.9   | 4.7   | 5.6   | 6.4   | 6.5   | 3.0    | 5.4    | 14.2  | 16.6  |
| AT4G39710 | 167.5 | 106.9 | 36.3  | 140.4 | 101.5 | 95.5   | 18.4   | 22.1  | 51.8  |
| AT4G39840 | 64.2  | 29.2  | 26.9  | 37.6  | 29.5  | 17.1   | 0.2    | 1.4   | 0.7   |
| AT5G01220 | 39.0  | 84.4  | 67.6  | 34.6  | 62.5  | 33.1   | 97.9   | 43.6  | 51.8  |
| AT5G01830 | 3.0   | 7.9   | 9.6   | 2.9   | 4.6   | 6.1    | 18.3   | 35.0  | 29.0  |
| AT5G02810 | 41.8  | 115.7 | 83.6  | 40.2  | 118.1 | 39.5   | 93.1   | 36.0  | 8.0   |
| AT5G02890 | 43.6  | 11.2  | 10.2  | 35.7  | 7.0   | 5.6    | 2.2    | 6.8   | 4.6   |
| AT5G03170 | 12.1  | 2.0   | 3.4   | 5.7   | 1.5   | 1.2    | 9.1    | 3.9   | 0.8   |
| AT5G03730 | 30.6  | 52.6  | 46.4  | 31.0  | 51.5  | 28.9   | 57.6   | 188.8 | 152.5 |
| AT5G03760 | 29.9  | 2.1   | 2.7   | 18.4  | 2.8   | 1.9    | 0.2    | 0.4   | 1.4   |
| AT5G04885 | 11.9  | 8.1   | 6.5   | 12.4  | 7.1   | 4.6    | 2.9    | 42.7  | 18.6  |
| AT5G05170 | 238.4 | 164.9 | 153.4 | 217.1 | 194.5 | 132.8  | 2.9    | 8.8   | 4.5   |
| AT5G05930 | 17.5  | 38.5  | 33.9  | 22.0  | 31.5  | 35.7   | 5.9    | 48.2  | 32.5  |
| AT5G06570 | 30.4  | 66.8  | 63.4  | 10.7  | 30.1  | 26.1   | 148.0  | 118.3 | 124.8 |
| AT5G07020 | 72.5  | 54.7  | 36.5  | 75.0  | 99.8  | 33.9   | 354.6  | 83.0  | 36.0  |
| AT5G07070 | 9.3   | 14.4  | 15.6  | 9.0   | 19.6  | 15.5   | 181.6  | 145.0 | 110.0 |
| AT5G08180 | 73.6  | 37.6  | 37.4  | 86.8  | 78.5  | 93.0   | 57.5   | 67.6  | 98.3  |
| AT5G08350 | 0.2   | 0.7   | 2.2   | 0.7   | 2.9   | 3.7    | 34.4   | 27.6  | 19.0  |
| AT5G08610 | 49.6  | 36.6  | 47.4  | 49.2  | 38.1  | 29.5   | 19.7   | 46.2  | 98.5  |
| AT5G09530 | 12.3  | 0.8   | 2.0   | 0.7   | 0.4   | 0.2    | 6.8    | 61.8  | 22.2  |
| AT5G09760 | 94.6  | 59.6  | 39.5  | 45.7  | 48.1  | 24.8   | 5.7    | 14.9  | 10.0  |
| AT5G09930 | 4.0   | 2.4   | 5.3   | 2.9   | 1.9   | 1.1    | 1180.1 | 230.9 | 99.5  |
| AT5G10930 | 74.7  | 53.2  | 36.9  | 32.3  | 34.6  | 13.2   | 62.6   | 17.7  | 25.6  |
| AT5G11260 | 57.2  | 21.1  | 42.2  | 60.8  | 25.9  | 51.1   | 49.1   | 24.6  | 8.6   |
| AT5G11890 | 117.5 | 81.0  | 85.7  | 72.6  | 82.4  | 63.0   | 24.3   | 15.6  | 9.1   |
| AT5G11950 | 14.1  | 12.1  | 13.3  | 22.5  | 9.0   | 17.6   | 124.5  | 70.5  | 29.1  |
| AT5G12140 | 314.6 | 379.6 | 303.6 | 280.5 | 256.3 | 292.4  | 228.0  | 587.0 | 552.3 |
| AT5G12300 | 9.7   | 3.2   | 5.7   | 5.4   | 2.7   | 1.9    | 19.6   | 7.2   | 4.6   |
| AT5G12950 | 49.9  | 34.8  | 30.0  | 36.9  | 42.2  | 23.9   | 20.9   | 19.6  | 23.6  |
| AT5G13190 | 44.7  | 61.6  | 42.8  | 65.4  | 95.8  | 146.8  | 11.9   | 31.5  | 21.2  |

|           |        |       |       |       |       |        |       |       |       |
|-----------|--------|-------|-------|-------|-------|--------|-------|-------|-------|
| AT5G13500 | 34.7   | 31.1  | 29.7  | 29.3  | 23.8  | 24.4   | 9.6   | 14.2  | 14.1  |
| AT5G13630 | 320.9  | 161.3 | 146.4 | 225.3 | 96.5  | 30.4   | 88.6  | 167.8 | 55.8  |
| AT5G13930 | 33.6   | 5.5   | 5.0   | 47.6  | 6.2   | 4.1    | 8.6   | 58.1  | 7.2   |
| AT5G14180 | 3.8    | 5.6   | 15.9  | 10.6  | 16.7  | 23.8   | 0.3   | 2.1   | 1.3   |
| AT5G14360 | 17.4   | 6.2   | 3.2   | 11.9  | 5.7   | 12.1   | 0.0   | 11.0  | 2.5   |
| AT5G14580 | 2.9    | 4.7   | 8.0   | 1.8   | 6.1   | 3.2    | 3.2   | 8.4   | 7.9   |
| AT5G14700 | 4.4    | 1.6   | 2.6   | 3.5   | 3.1   | 4.1    | 22.2  | 18.3  | 8.9   |
| AT5G14760 | 8.1    | 3.1   | 6.0   | 5.6   | 4.6   | 4.6    | 24.4  | 9.6   | 9.1   |
| AT5G14910 | 105.4  | 26.8  | 61.9  | 86.4  | 53.6  | 60.9   | 23.3  | 26.9  | 63.8  |
| AT5G15120 | 0.4    | 2.4   | 0.4   | 0.8   | 3.1   | 2.2    | 10.4  | 19.3  | 8.7   |
| AT5G15250 | 0.5    | 0.5   | 0.1   | 2.2   | 0.8   | 0.4    | 4.3   | 0.9   | 0.1   |
| AT5G15550 | 11.6   | 7.8   | 19.6  | 11.9  | 15.0  | 10.9   | 5.6   | 17.2  | 19.9  |
| AT5G15780 | 699.7  | 127.5 | 186.9 | 397.3 | 235.5 | 229.7  | 3.1   | 1.8   | 0.1   |
| AT5G15802 | 21.7   | 9.0   | 8.1   | 20.7  | 14.8  | 20.9   | 35.1  | 33.4  | 67.1  |
| AT5G16010 | 80.9   | 50.3  | 49.1  | 93.0  | 49.9  | 33.2   | 164.7 | 32.2  | 12.5  |
| AT5G17230 | 164.4  | 91.1  | 73.0  | 228.6 | 101.4 | 130.6  | 163.6 | 68.1  | 53.8  |
| AT5G17420 | 6.0    | 2.8   | 4.0   | 2.0   | 0.8   | 0.4    | 1.4   | 5.6   | 0.6   |
| AT5G18460 | 44.7   | 11.5  | 13.7  | 33.2  | 15.6  | 21.5   | 0.2   | 2.4   | 0.3   |
| AT5G18670 | 53.8   | 49.6  | 69.9  | 81.0  | 52.8  | 60.2   | 120.0 | 37.7  | 35.4  |
| AT5G18860 | 12.5   | 17.2  | 5.7   | 30.4  | 10.8  | 16.8   | 39.2  | 45.9  | 16.6  |
| AT5G19530 | 48.1   | 111.0 | 80.0  | 50.6  | 96.0  | 72.6   | 0.3   | 2.6   | 4.4   |
| AT5G19850 | 14.9   | 14.0  | 10.7  | 20.0  | 12.9  | 4.9    | 29.9  | 11.7  | 16.0  |
| AT5G20140 | 17.5   | 40.5  | 32.8  | 19.8  | 15.6  | 8.6    | 145.0 | 30.7  | 6.4   |
| AT5G20250 | 13.6   | 206.4 | 567.1 | 39.9  | 297.4 | 360.3  | 9.8   | 38.2  | 21.2  |
| AT5G20720 | 256.3  | 116.7 | 110.9 | 430.8 | 236.7 | 229.6  | 89.2  | 118.5 | 245.0 |
| AT5G20935 | 81.5   | 56.9  | 39.5  | 60.6  | 57.0  | 92.4   | 7.0   | 10.4  | 23.6  |
| AT5G21100 | 57.8   | 5.7   | 8.3   | 41.5  | 3.6   | 2.5    | 0.7   | 3.9   | 0.8   |
| AT5G21170 | 101.3  | 402.7 | 528.8 | 361.3 | 649.7 | 1185.0 | 71.0  | 129.0 | 113.6 |
| AT5G22920 | 4.6    | 34.5  | 89.4  | 17.7  | 54.6  | 86.1   | 14.3  | 57.5  | 30.3  |
| AT5G23050 | 24.2   | 80.4  | 126.5 | 99.2  | 147.0 | 205.7  | 43.6  | 176.5 | 114.8 |
| AT5G23240 | 27.8   | 423.8 | 251.1 | 52.5  | 302.4 | 264.7  | 2.6   | 51.2  | 75.7  |
| AT5G23340 | 13.5   | 10.2  | 15.2  | 16.0  | 15.2  | 19.7   | 2.5   | 2.4   | 0.1   |
| AT5G23530 | 12.4   | 40.8  | 24.4  | 4.7   | 17.3  | 12.8   | 78.6  | 86.9  | 61.4  |
| AT5G23810 | 1.4    | 1.0   | 2.0   | 0.1   | 1.0   | 0.4    | 11.7  | 16.6  | 20.4  |
| AT5G24000 | 9.9    | 10.7  | 10.5  | 13.6  | 8.8   | 14.2   | 11.5  | 2.2   | 0.5   |
| AT5G24120 | 58.3   | 42.1  | 61.9  | 65.7  | 36.4  | 23.8   | 518.0 | 95.5  | 27.8  |
| AT5G24270 | 3.4    | 3.9   | 0.9   | 1.5   | 1.8   | 0.7    | 17.0  | 6.7   | 11.3  |
| AT5G24300 | 27.4   | 22.7  | 24.7  | 24.8  | 24.4  | 10.5   | 23.5  | 6.2   | 6.7   |
| AT5G24530 | 454.3  | 216.6 | 223.6 | 126.9 | 106.7 | 74.3   | 3.8   | 30.9  | 7.7   |
| AT5G24770 | 501.2  | 0.4   | 1.8   | 20.9  | 0.9   | 0.2    | 92.0  | 69.9  | 21.4  |
| AT5G24800 | 67.1   | 60.4  | 64.7  | 45.4  | 34.7  | 51.7   | 72.6  | 41.1  | 38.7  |
| AT5G24850 | 4.2    | 1.2   | 1.5   | 4.9   | 2.7   | 3.5    | 10.2  | 3.2   | 1.6   |
| AT5G25610 | 1454.2 | 938.0 | 711.0 | 573.8 | 284.4 | 129.2  | 4.3   | 2.7   | 0.0   |
| AT5G25770 | 10.1   | 10.3  | 16.3  | 7.1   | 6.9   | 5.1    | 58.7  | 17.3  | 9.5   |
| AT5G25930 | 32.5   | 85.1  | 56.3  | 18.7  | 79.0  | 79.8   | 133.5 | 198.9 | 230.5 |
| AT5G26340 | 9.5    | 9.9   | 14.3  | 1.1   | 6.1   | 7.1    | 120.2 | 44.1  | 65.9  |
| AT5G26920 | 49.3   | 23.2  | 37.7  | 13.8  | 22.0  | 32.2   | 11.2  | 92.1  | 55.0  |
| AT5G28300 | 38.2   | 35.4  | 15.8  | 30.7  | 52.7  | 24.2   | 0.0   | 0.9   | 0.3   |

|           |       |        |        |        |        |        |        |        |       |
|-----------|-------|--------|--------|--------|--------|--------|--------|--------|-------|
| AT5G28750 | 79.8  | 49.3   | 43.4   | 145.4  | 83.3   | 108.6  | 33.4   | 228.2  | 185.6 |
| AT5G35630 | 696.1 | 527.3  | 331.2  | 780.7  | 606.4  | 424.7  | 603.6  | 261.1  | 104.5 |
| AT5G35970 | 29.8  | 25.0   | 26.5   | 43.3   | 27.4   | 7.2    | 96.7   | 25.6   | 12.9  |
| AT5G39000 | 119.7 | 123.4  | 117.4  | 114.0  | 139.5  | 197.4  | 48.8   | 92.6   | 82.6  |
| AT5G39660 | 112.1 | 18.7   | 42.0   | 117.8  | 18.3   | 35.3   | 72.0   | 40.3   | 21.3  |
| AT5G40500 | 18.8  | 25.2   | 15.7   | 17.4   | 34.9   | 33.2   | 39.1   | 29.5   | 5.6   |
| AT5G41040 | 5.0   | 2.0    | 1.1    | 2.3    | 2.6    | 3.3    | 1.0    | 7.3    | 3.3   |
| AT5G42070 | 64.0  | 29.9   | 27.7   | 86.5   | 64.8   | 49.7   | 141.3  | 27.7   | 7.3   |
| AT5G42370 | 0.1   | 0.5    | 0.3    | 0.0    | 0.8    | 0.6    | 2.8    | 1.4    | 3.8   |
| AT5G42390 | 130.7 | 200.5  | 193.8  | 178.6  | 213.0  | 135.4  | 43.4   | 182.3  | 98.3  |
| AT5G42760 | 3.1   | 0.7    | 0.8    | 8.0    | 2.4    | 1.7    | 41.3   | 11.6   | 16.1  |
| AT5G43150 | 118.8 | 67.1   | 56.7   | 256.1  | 101.8  | 101.0  | 149.6  | 69.4   | 88.8  |
| AT5G44030 | 7.4   | 3.8    | 4.5    | 4.3    | 1.2    | 1.1    | 2.9    | 4.7    | 1.0   |
| AT5G46800 | 73.2  | 15.0   | 20.1   | 98.1   | 23.2   | 19.2   | 520.7  | 121.3  | 40.2  |
| AT5G46910 | 5.2   | 2.6    | 1.6    | 2.7    | 3.3    | 4.4    | 4.5    | 7.4    | 4.4   |
| AT5G47040 | 31.2  | 99.3   | 74.6   | 50.7   | 76.6   | 53.2   | 104.0  | 279.7  | 225.9 |
| AT5G47240 | 2.9   | 12.4   | 29.0   | 7.5    | 29.1   | 41.9   | 11.4   | 18.2   | 2.5   |
| AT5G47560 | 107.4 | 79.2   | 72.5   | 102.4  | 96.4   | 62.4   | 119.8  | 248.6  | 46.2  |
| AT5G48310 | 0.7   | 0.1    | 0.1    | 0.4    | 0.1    | 0.1    | 2.4    | 0.4    | 0.3   |
| AT5G48485 | 12.8  | 7.0    | 9.1    | 112.0  | 51.4   | 107.2  | 35.7   | 107.0  | 30.7  |
| AT5G48790 | 24.0  | 17.5   | 21.4   | 49.7   | 35.5   | 17.5   | 1.9    | 16.1   | 6.4   |
| AT5G49480 | 24.8  | 11.5   | 18.7   | 11.3   | 7.1    | 13.7   | 238.9  | 49.4   | 40.0  |
| AT5G49940 | 64.3  | 99.3   | 105.8  | 137.8  | 193.7  | 208.6  | 237.6  | 78.8   | 68.8  |
| AT5G50200 | 59.4  | 105.5  | 110.3  | 44.2   | 88.9   | 114.6  | 1.4    | 7.9    | 8.4   |
| AT5G50570 | 8.5   | 8.0    | 4.0    | 9.5    | 10.5   | 8.9    | 9.8    | 9.4    | 5.2   |
| AT5G53730 | 135.9 | 303.0  | 223.5  | 84.0   | 109.0  | 157.8  | 9.6    | 25.2   | 30.0  |
| AT5G54080 | 48.0  | 193.9  | 405.1  | 126.8  | 263.2  | 581.0  | 78.1   | 30.0   | 24.0  |
| AT5G54270 | 606.8 | 636.7  | 250.0  | 951.7  | 1124.1 | 151.0  | 1875.0 | 486.5  | 50.1  |
| AT5G54770 | 957.9 | 2020.5 | 1822.7 | 1403.7 | 1640.9 | 1040.6 | 146.1  | 1189.3 | 256.2 |
| AT5G55630 | 29.5  | 17.5   | 21.7   | 35.2   | 24.0   | 24.6   | 148.8  | 24.3   | 11.9  |
| AT5G56840 | 71.1  | 34.2   | 27.8   | 34.7   | 20.7   | 32.9   | 365.9  | 161.0  | 182.8 |
| AT5G56850 | 24.9  | 24.0   | 37.4   | 22.1   | 27.6   | 63.4   | 43.7   | 16.5   | 7.0   |
| AT5G56890 | 38.7  | 23.2   | 22.7   | 20.3   | 14.8   | 8.6    | 70.9   | 25.7   | 10.2  |
| AT5G57170 | 24.1  | 22.2   | 5.1    | 51.9   | 23.6   | 21.8   | 13.2   | 9.2    | 38.4  |
| AT5G58070 | 183.9 | 379.5  | 296.4  | 179.9  | 319.7  | 284.0  | 233.2  | 90.2   | 98.5  |
| AT5G58560 | 24.5  | 18.0   | 13.6   | 21.8   | 26.5   | 19.6   | 86.1   | 45.0   | 52.5  |
| AT5G60600 | 170.4 | 192.4  | 202.6  | 245.4  | 216.8  | 99.0   | 515.3  | 159.0  | 137.2 |
| AT5G60720 | 2.7   | 2.1    | 1.9    | 1.4    | 0.4    | 0.5    | 1.9    | 0.4    | 0.4   |
| AT5G60920 | 183.2 | 93.0   | 85.8   | 112.7  | 79.2   | 42.3   | 6.6    | 14.8   | 12.5  |
| AT5G61380 | 58.8  | 320.1  | 380.9  | 102.3  | 260.5  | 344.4  | 13.1   | 49.0   | 25.7  |
| AT5G61510 | 74.1  | 74.8   | 75.6   | 50.6   | 32.7   | 61.0   | 2.6    | 0.4    | 1.0   |
| AT5G62190 | 72.8  | 47.9   | 60.5   | 101.6  | 70.9   | 49.5   | 22.8   | 64.1   | 67.1  |
| AT5G63100 | 27.3  | 9.8    | 10.6   | 11.3   | 5.1    | 8.0    | 9.1    | 3.2    | 1.8   |
| AT5G63380 | 13.3  | 7.9    | 9.3    | 15.6   | 6.9    | 4.3    | 67.3   | 100.2  | 68.1  |
| AT5G64170 | 23.4  | 40.4   | 35.6   | 59.4   | 79.1   | 34.8   | 244.4  | 54.6   | 31.5  |
| AT5G64530 | 9.9   | 30.1   | 24.6   | 14.7   | 25.9   | 36.8   | 5.5    | 0.7    | 0.3   |
| AT5G64810 | 87.7  | 44.8   | 57.6   | 16.1   | 34.8   | 38.9   | 43.6   | 116.7  | 110.5 |
| AT5G66170 | 15.1  | 4.9    | 11.8   | 30.7   | 15.7   | 9.8    | 13.4   | 24.8   | 24.1  |

|           |       |       |       |       |       |       |       |       |      |
|-----------|-------|-------|-------|-------|-------|-------|-------|-------|------|
| AT5G67030 | 206.4 | 393.5 | 470.7 | 312.0 | 369.2 | 183.1 | 74.7  | 52.9  | 13.6 |
| AT5G67370 | 26.2  | 24.5  | 33.5  | 86.0  | 42.2  | 27.8  | 593.8 | 131.6 | 46.7 |
| AT5G67390 | 5.7   | 9.3   | 16.6  | 12.5  | 13.2  | 8.5   | 1.5   | 34.8  | 14.7 |
| AT5G67550 | 4.7   | 2.5   | 2.6   | 3.8   | 1.5   | 1.4   | 0.5   | 4.2   | 1.8  |

---

**Supplementary Table 3** Significant GO and KEGG enrichments in rice and *Brassica oleracea* upon up- and down-regulated DEGs

| Category                                                         | Term                                                          | Count | %    | P-Value   | List Total | Pop Hits | Pop Total | Fold Enrichment | Bonferroni | Benjamini | FDR       |
|------------------------------------------------------------------|---------------------------------------------------------------|-------|------|-----------|------------|----------|-----------|-----------------|------------|-----------|-----------|
| <b>By 2166 up-regulated DEGs in rice</b>                         |                                                               |       |      |           |            |          |           |                 |            |           |           |
| GOTERM_BP_FAT                                                    | GO:0019748~secondary metabolic process                        | 26    | 1.9  | 2.709E-09 | 567        | 96       | 8363      | 3.995           | 1.379E-06  | 1.379E-06 | 3.911E-06 |
| GOTERM_BP_FAT                                                    | GO:0055114~oxidation reduction                                | 118   | 8.7  | 2.785E-09 | 567        | 1025     | 8363      | 1.698           | 1.418E-06  | 7.088E-07 | 4.021E-06 |
| GOTERM_BP_FAT                                                    | GO:0006979~response to oxidative stress                       | 26    | 2.2  | 2.711E-07 | 567        | 152      | 8363      | 2.911           | 1.380E-04  | 4.599E-05 | 3.913E-04 |
| GOTERM_BP_FAT                                                    | GO:0009765~photosynthesis, light harvesting                   | 10    | 0.7  | 4.163E-07 | 567        | 17       | 8363      | 8.676           | 2.119E-04  | 5.297E-05 | 6.010E-04 |
| GOTERM_BP_FAT                                                    | GO:0009698~phenylpropanoid metabolic process                  | 16    | 1.2  | 7.745E-07 | 567        | 51       | 8363      | 4.627           | 3.941E-04  | 7.884E-05 | 1.118E-03 |
| GOTERM_BP_FAT                                                    | GO:0006575~cellular amino acid derivative metabolic process   | 21    | 1.6  | 2.667E-05 | 567        | 107      | 8363      | 2.895           | 1.348E-02  | 2.260E-03 | 3.849E-02 |
| GOTERM_CC_FAT                                                    | GO:0005576~extracellular region                               | 48    | 3.5  | 1.226E-13 | 409        | 273      | 7887      | 3.391           | 1.275E-11  | 1.275E-11 | 1.370E-10 |
| GOTERM_CC_FAT                                                    | GO:0048046~apoplast                                           | 19    | 1.4  | 9.081E-06 | 409        | 108      | 7887      | 3.392           | 9.440E-04  | 4.721E-04 | 1.015E-02 |
| GOTERM_CC_FAT                                                    | GO:0005618~cell wall                                          | 19    | 1.4  | 1.961E-05 | 409        | 114      | 7887      | 3.214           | 2.037E-03  | 6.794E-04 | 2.192E-02 |
| GOTERM_CC_FAT                                                    | GO:0030312~external encapsulating structure                   | 19    | 1.4  | 3.559E-05 | 409        | 119      | 7887      | 3.079           | 3.695E-03  | 9.250E-04 | 3.979E-02 |
| GOTERM_CC_FAT                                                    | GO:0019898~extrinsic to membrane                              | 14    | 1.0  | 4.281E-05 | 409        | 69       | 7887      | 3.913           | 4.442E-03  | 8.900E-04 | 4.785E-02 |
| GOTERM_MF_FAT                                                    | GO:0016684~oxidoreductase activity, acting on peroxide as acc | 33    | 2.4  | 1.877E-08 | 693        | 164      | 10565     | 3.068           | 7.977E-06  | 7.977E-06 | 2.641E-05 |
| GOTERM_MF_FAT                                                    | GO:0004601~peroxidase activity                                | 33    | 2.4  | 1.877E-08 | 693        | 164      | 10565     | 3.068           | 7.977E-06  | 7.977E-06 | 2.641E-05 |
| GOTERM_MF_FAT                                                    | GO:0016209~antioxidant activity                               | 33    | 2.4  | 2.096E-07 | 693        | 181      | 10565     | 2.780           | 8.909E-05  | 4.455E-05 | 2.950E-04 |
| GOTERM_MF_FAT                                                    | GO:0005506~iron ion binding                                   | 77    | 5.7  | 3.190E-06 | 693        | 687      | 10565     | 1.709           | 1.355E-03  | 4.518E-04 | 4.489E-03 |
| GOTERM_MF_FAT                                                    | GO:0043169~cation binding                                     | 238   | 17.6 | 3.122E-05 | 693        | 2904     | 10565     | 1.249           | 1.318E-02  | 3.312E-03 | 4.393E-02 |
| GOTERM_MF_FAT                                                    | GO:0043167~ion binding                                        | 238   | 17.6 | 3.269E-05 | 693        | 2905     | 10565     | 1.249           | 1.380E-02  | 2.775E-03 | 4.598E-02 |
| KEGG_PATHWAY                                                     | osa00940~Phenylpropanoid biosynthesis                         | 14    | 1.0  | 9.455E-07 | 148        | 37       | 1977      | 5.054           | 7.942E-05  | 7.942E-05 | 1.015E-03 |
| <b>By 1304 down-regulated DEGs in rice</b>                       |                                                               |       |      |           |            |          |           |                 |            |           |           |
| GOTERM_CC_FAT                                                    | GO:0016021~integral to membrane                               | 54    | 7.22 | 1.892E-06 | 187        | 1196     | 7887      | 1.904           | 1.589E-04  | 1.589E-04 | 2.031E-03 |
| GOTERM_CC_FAT                                                    | GO:0031224~intrinsic to membrane                              | 55    | 7.35 | 1.897E-06 | 187        | 1229     | 7887      | 1.887           | 1.593E-04  | 7.967E-05 | 2.036E-03 |
| <b>By 630 up-regulated DEGs specific to R <i>B. oleracea</i></b> |                                                               |       |      |           |            |          |           |                 |            |           |           |
| GOTERM_BP_FAT                                                    | GO:0009628~response to abiotic stimulus                       | 71    | 11.5 | 8.985E-11 | 367        | 1197     | 13998     | 2.262           | 8.724E-08  | 8.724E-08 | 1.414E-07 |
| GOTERM_BP_FAT                                                    | GO:0006979~response to oxidative stress                       | 17    | 3.06 | 6.408E-06 | 367        | 287      | 13998     | 2.614           | 6.470E-03  | 5.408E-04 | 1.014E-02 |
| GOTERM_BP_FAT                                                    | GO:0009314~response to radiation                              | 30    | 4.85 | 2.700E-05 | 367        | 482      | 13998     | 2.374           | 2.587E-02  | 8.700E-03 | 4.249E-02 |

|                                                                     |                                                         |    |      |           |     |      |       |       |           |           |           |
|---------------------------------------------------------------------|---------------------------------------------------------|----|------|-----------|-----|------|-------|-------|-----------|-----------|-----------|
| GOTERM_BP_FAT                                                       | GO:0010033~response to organic substance                | 55 | 8.89 | 3.165E-05 | 367 | 1176 | 13998 | 1.784 | 3.026E-02 | 7.653E-03 | 4.980E-02 |
| <b>by 875 down-regulated DEGs specific to <i>R. B. oleracea</i></b> |                                                         |    |      |           |     |      |       |       |           |           |           |
| GOTERM_BP_FAT                                                       | GO:0009617~response to bacterium                        | 23 | 2.94 | 1.796E-05 | 460 | 244  | 13998 | 2.868 | 1.775E-02 | 8.916E-03 | 2.837E-02 |
| GOTERM_BP_FAT                                                       | GO:0010033~response to organic substance                | 66 | 8.44 | 1.952E-05 | 460 | 1176 | 13998 | 1.708 | 1.928E-02 | 6.468E-03 | 3.083E-02 |
| GOTERM_CC_FAT                                                       | GO:0033279~ribosomal subunit                            | 49 | 6.27 | 2.292E-20 | 460 | 294  | 13779 | 4.992 | 4.562E-18 | 4.562E-18 | 2.871E-17 |
| GOTERM_CC_FAT                                                       | GO:0022626~cytosolic ribosome                           | 50 | 6.39 | 9.859E-20 | 460 | 317  | 13779 | 4.725 | 1.962E-17 | 9.810E-18 | 1.235E-16 |
| GOTERM_CC_FAT                                                       | GO:0005840~ribosome                                     | 61 | 7.8  | 1.045E-19 | 460 | 470  | 13779 | 3.888 | 2.080E-17 | 6.933E-18 | 1.309E-16 |
| GOTERM_CC_FAT                                                       | GO:0044445~cytosolic part                               | 43 | 5.5  | 4.214E-17 | 460 | 271  | 13779 | 4.753 | 8.386E-15 | 2.097E-15 | 5.278E-14 |
| GOTERM_CC_FAT                                                       | GO:0030529~ribonucleoprotein complex                    | 67 | 8.57 | 1.336E-15 | 460 | 671  | 13779 | 2.991 | 2.651E-13 | 5.307E-14 | 1.665E-12 |
| GOTERM_CC_FAT                                                       | GO:0043232~intracellular non-membrane-bounded organelle | 87 | 11.1 | 3.671E-13 | 460 | 1144 | 13779 | 2.278 | 7.306E-11 | 1.218E-11 | 4.598E-10 |
| GOTERM_CC_FAT                                                       | GO:0043228~non-membrane-bounded organelle               | 87 | 11.1 | 3.671E-13 | 460 | 1144 | 13779 | 2.278 | 7.306E-11 | 1.218E-11 | 4.598E-10 |
| GOTERM_CC_FAT                                                       | GO:0005829~cytosol                                      | 64 | 8.18 | 6.646E-13 | 460 | 708  | 13779 | 2.708 | 1.323E-10 | 1.890E-11 | 8.324E-10 |
| GOTERM_CC_FAT                                                       | GO:0015934~large ribosomal subunit                      | 29 | 3.71 | 3.295E-12 | 460 | 173  | 13779 | 5.021 | 6.557E-10 | 8.196E-11 | 4.127E-09 |
| GOTERM_CC_FAT                                                       | GO:0005618~cell wall                                    | 53 | 6.78 | 4.189E-10 | 460 | 611  | 13779 | 2.598 | 8.337E-08 | 9.263E-09 | 5.247E-07 |
| GOTERM_CC_FAT                                                       | GO:0030312~external encapsulating structure             | 53 | 6.78 | 7.081E-10 | 460 | 620  | 13779 | 2.561 | 1.409E-07 | 1.409E-08 | 8.868E-07 |
| GOTERM_CC_FAT                                                       | GO:0022625~cytosolic large ribosomal subunit            | 23 | 2.94 | 9.686E-10 | 460 | 138  | 13779 | 4.992 | 1.927E-07 | 1.752E-08 | 1.213E-06 |
| GOTERM_CC_FAT                                                       | GO:0022627~cytosolic small ribosomal subunit            | 20 | 2.56 | 6.386E-09 | 460 | 114  | 13779 | 5.255 | 1.271E-06 | 9.775E-08 | 7.998E-06 |
| GOTERM_CC_FAT                                                       | GO:0015935~small ribosomal subunit                      | 21 | 2.69 | 1.584E-08 | 460 | 133  | 13779 | 4.730 | 3.152E-06 | 2.252E-07 | 1.984E-05 |
| GOTERM_CC_FAT                                                       | GO:0005730~nucleolus                                    | 32 | 4.09 | 2.279E-07 | 460 | 332  | 13779 | 2.887 | 4.535E-05 | 3.024E-06 | 2.854E-04 |
| GOTERM_CC_FAT                                                       | GO:0031981~nuclear lumen                                | 35 | 4.48 | 2.034E-05 | 460 | 472  | 13779 | 2.221 | 4.039E-03 | 2.529E-04 | 2.547E-02 |
| GOTERM_MF_FAT                                                       | GO:0003735~structural constituent of ribosome           | 56 | 7.16 | 5.959E-20 | 492 | 394  | 14806 | 4.277 | 2.545E-17 | 2.545E-17 | 8.391E-17 |
| GOTERM_MF_FAT                                                       | GO:0005198~structural molecule activity                 | 60 | 7.67 | 3.876E-16 | 492 | 538  | 14806 | 3.356 | 1.422E-13 | 7.105E-14 | 4.663E-13 |
| <b>by 940 up-regulated DEGs specific to <i>S. B. oleracea</i></b>   |                                                         |    |      |           |     |      |       |       |           |           |           |
| GOTERM_BP_FAT                                                       | GO:0010200~response to chitin                           | 27 | 3.39 | 1.656E-14 | 440 | 127  | 13998 | 6.764 | 1.481E-11 | 1.481E-11 | 2.577E-11 |
| GOTERM_BP_FAT                                                       | GO:0009743~response to carbohydrate stimulus            | 30 | 3.77 | 4.504E-12 | 440 | 199  | 13998 | 4.796 | 4.031E-09 | 2.016E-09 | 7.016E-09 |
| GOTERM_BP_FAT                                                       | GO:0010033~response to organic substance                | 73 | 9.17 | 2.329E-08 | 440 | 1176 | 13998 | 1.975 | 2.084E-05 | 6.947E-06 | 3.627E-05 |
| <b>by 828 down-regulated DEGs specific to <i>S. B. oleracea</i></b> |                                                         |    |      |           |     |      |       |       |           |           |           |
| GOTERM_BP_FAT                                                       | GO:0016051~carbohydrate biosynthetic process            | 27 | 3.57 | 5.553E-07 | 477 | 254  | 13998 | 3.119 | 6.217E-04 | 6.217E-04 | 8.900E-04 |
| GOTERM_BP_FAT                                                       | GO:0009628~response to abiotic stimulus                 | 74 | 9.79 | 5.792E-07 | 477 | 1197 | 13998 | 1.814 | 6.485E-04 | 3.243E-04 | 9.284E-04 |
| GOTERM_BP_FAT                                                       | GO:0009250~glucan biosynthetic process                  | 14 | 1.85 | 1.274E-06 | 477 | 75   | 13998 | 5.478 | 1.426E-03 | 4.755E-04 | 2.042E-03 |

|               |                                                         |     |      |           |     |      |       |       |           |           |           |
|---------------|---------------------------------------------------------|-----|------|-----------|-----|------|-------|-------|-----------|-----------|-----------|
| GOTERM_BP_FAT | GO:0009791~post-embryonic development                   | 57  | 7.54 | 1.427E-06 | 477 | 851  | 13998 | 1.966 | 1.597E-03 | 3.994E-04 | 2.287E-03 |
| GOTERM_BP_FAT | GO:0005976~polysaccharide metabolic process             | 24  | 3.17 | 1.621E-06 | 477 | 219  | 13998 | 3.216 | 1.814E-03 | 3.630E-04 | 2.598E-03 |
| GOTERM_BP_FAT | GO:0034637~cellular carbohydrate biosynthetic process   | 22  | 2.91 | 1.861E-06 | 477 | 189  | 13998 | 3.416 | 2.082E-03 | 3.473E-04 | 2.982E-03 |
| GOTERM_BP_FAT | GO:0000271~polysaccharide biosynthetic process          | 16  | 2.12 | 3.212E-06 | 477 | 107  | 13998 | 4.388 | 3.591E-03 | 5.138E-04 | 5.148E-03 |
| GOTERM_BP_FAT | GO:0044271~nitrogen compound biosynthetic process       | 39  | 5.16 | 4.043E-06 | 477 | 506  | 13998 | 2.262 | 4.518E-03 | 5.659E-04 | 6.480E-03 |
| GOTERM_BP_FAT | GO:0006073~cellular glucan metabolic process            | 17  | 2.25 | 4.595E-06 | 477 | 124  | 13998 | 4.023 | 5.133E-03 | 5.716E-04 | 7.364E-03 |
| GOTERM_BP_FAT | GO:0033692~cellular polysaccharide biosynthetic process | 15  | 1.98 | 9.832E-06 | 477 | 103  | 13998 | 4.274 | 1.095E-02 | 1.101E-03 | 1.576E-02 |
| GOTERM_BP_FAT | GO:0044042~glucan metabolic process                     | 18  | 2.38 | 1.490E-05 | 477 | 151  | 13998 | 3.498 | 1.655E-02 | 1.516E-03 | 2.388E-02 |
| GOTERM_BP_FAT | GO:0044264~cellular polysaccharide metabolic process    | 18  | 2.38 | 1.932E-05 | 477 | 154  | 13998 | 3.430 | 2.140E-02 | 1.801E-03 | 3.095E-02 |
| GOTERM_CC_FAT | GO:0044435~plastid part                                 | 79  | 10.4 | 1.658E-13 | 453 | 984  | 13779 | 2.442 | 3.879E-11 | 3.879E-11 | 2.131E-10 |
| GOTERM_CC_FAT | GO:0044434~chloroplast part                             | 77  | 10.2 | 2.775E-13 | 453 | 954  | 13779 | 2.455 | 6.495E-11 | 3.247E-11 | 3.568E-10 |
| GOTERM_CC_FAT | GO:0009507~chloroplast                                  | 171 | 22.6 | 1.644E-12 | 453 | 3192 | 13779 | 1.629 | 3.847E-10 | 1.282E-10 | 2.113E-09 |
| GOTERM_CC_FAT | GO:0009536~plastid                                      | 171 | 22.6 | 1.034E-11 | 453 | 3259 | 13779 | 1.596 | 2.420E-09 | 6.050E-10 | 1.330E-08 |
| GOTERM_CC_FAT | GO:0009570~chloroplast stroma                           | 44  | 5.82 | 3.072E-11 | 453 | 420  | 13779 | 3.187 | 7.189E-09 | 1.438E-09 | 3.949E-08 |
| GOTERM_CC_FAT | GO:0009532~plastid stroma                               | 45  | 5.95 | 4.530E-11 | 453 | 442  | 13779 | 3.097 | 1.060E-08 | 1.767E-09 | 5.823E-08 |
| GOTERM_CC_FAT | GO:0009526~plastid envelope                             | 45  | 5.95 | 1.791E-10 | 453 | 461  | 13779 | 2.969 | 4.191E-08 | 5.987E-09 | 2.302E-07 |
| GOTERM_CC_FAT | GO:0009941~chloroplast envelope                         | 42  | 5.56 | 1.592E-09 | 453 | 440  | 13779 | 2.903 | 3.726E-07 | 4.658E-08 | 2.047E-06 |
| GOTERM_CC_FAT | GO:0031975~envelope                                     | 55  | 7.28 | 4.116E-08 | 453 | 751  | 13779 | 2.228 | 9.630E-06 | 1.070E-06 | 5.291E-05 |
| GOTERM_CC_FAT | GO:0031967~organelle envelope                           | 54  | 7.14 | 8.024E-08 | 453 | 745  | 13779 | 2.205 | 1.878E-05 | 1.878E-06 | 1.032E-04 |
| GOTERM_MF_FAT | GO:0046527~glucosyltransferase activity                 | 17  | 2.25 | 1.086E-05 | 487 | 137  | 14806 | 3.773 | 6.493E-03 | 6.493E-03 | 1.603E-02 |

## Continued

### KEGG enrichments

| ID                     | Term                                                   | Nr. Genes | % Associated Genes | Term P-Value     | Term P-Value Corrected with Bonferroni |
|------------------------|--------------------------------------------------------|-----------|--------------------|------------------|----------------------------------------|
| <b>R-specific up</b>   |                                                        |           |                    |                  |                                        |
| <b>KEGG:04146</b>      | <b>Peroxisome</b>                                      | <b>19</b> | <b>15.079364</b>   | <b>1.993E-05</b> | <b>2.990E-04</b>                       |
| KEGG:00630             | Glyoxylate and dicarboxylate metabolism                | 6         | 5.3097343          | 5.229E-03        | 7.843E-02                              |
| KEGG:00960             | Tropane, piperidine and pyridine alkaloid biosynthesis | 4         | 7.6923075          | 6.151E-03        | 9.226E-02                              |
| KEGG:00740             | Riboflavin metabolism                                  | 2         | 20                 | 8.353E-03        | 1.253E-01                              |
| KEGG:00350             | Tyrosine metabolism                                    | 4         | 6.6666665          | 1.017E-02        | 1.525E-01                              |
| KEGG:00950             | Isoquinoline alkaloid biosynthesis                     | 3         | 8.823529           | 1.210E-02        | 1.815E-01                              |
| KEGG:00450             | Selenocompound metabolism                              | 3         | 8.1081085          | 1.524E-02        | 2.286E-01                              |
| KEGG:00905             | Brassinosteroid biosynthesis                           | 2         | 13.333333          | 1.861E-02        | 2.792E-01                              |
| KEGG:00590             | Arachidonic acid metabolism                            | 2         | 9.090909           | 3.840E-02        | 5.761E-01                              |
| KEGG:00130             | Ubiquinone and other terpenoid-quinone biosynthesis    | 3         | 5.6603775          | 3.908E-02        | 5.863E-01                              |
| KEGG:00380             | Tryptophan metabolism                                  | 3         | 5.6603775          | 3.908E-02        | 5.863E-01                              |
| KEGG:03020             | RNA polymerase                                         | 3         | 5.5555553          | 4.097E-02        | 6.146E-01                              |
| KEGG:00250             | Alanine, aspartate and glutamate metabolism            | 4         | 4.3010755          | 4.285E-02        | 6.428E-01                              |
| KEGG:00592             | alpha-Linolenic acid metabolism                        | 2         | 4                  | 1.584E-01        | 1                                      |
| KEGG:00906             | Carotenoid biosynthesis                                | 2         | 4.6511626          | 1.243E-01        | 1                                      |
| <b>R-specific down</b> |                                                        |           |                    |                  |                                        |
| <b>KEGG:03010</b>      | <b>Ribosome</b>                                        | <b>56</b> | <b>14.043584</b>   | <b>2.907E-22</b> | <b>6.687E-21</b>                       |
| KEGG:00260             | Glycine, serine and threonine metabolism               | 7         | 7.7777777          | 3.037E-02        | 6.986E-01                              |
| KEGG:00053             | Ascorbate and aldarate metabolism                      | 5         | 8.77193            | 4.089E-02        | 9.406E-01                              |
| KEGG:00040             | Pentose and glucuronate interconversions               | 4         | 4.9382715          | 3.486E-01        | 1                                      |
| KEGG:00073             | Cutin, suberine and wax biosynthesis                   | 3         | 8.823529           | 1.035E-01        | 1                                      |
| KEGG:00196             | Photosynthesis                                         | 2         | 5.4054055          | 3.523E-01        | 1                                      |
| KEGG:00230             | Purine metabolism                                      | 10        | 4.484305           | 3.388E-01        | 1                                      |
| KEGG:00250             | Alanine, aspartate and glutamate metabolism            | 4         | 4.3010755          | 5.541E-01        | 1                                      |

|                      |                                                     |           |                  |                  |                  |
|----------------------|-----------------------------------------------------|-----------|------------------|------------------|------------------|
| KEGG:00360           | Phenylalanine metabolism                            | 6         | 4.6875           | 3.245E-01        | 1                |
| KEGG:00400           | Phenylalanine, tyrosine and tryptophan biosynthesis | 4         | 4.7619047        | 3.652E-01        | 1                |
| KEGG:00410           | beta-Alanine metabolism                             | 3         | 6.122449         | 2.245E-01        | 1                |
| KEGG:00510           | N-Glycan biosynthesis                               | 3         | 4.477612         | 4.906E-01        | 1                |
| KEGG:00562           | Inositol phosphate metabolism                       | 6         | 6.6666665        | 1.258E-01        | 1                |
| KEGG:00640           | Propanoate metabolism                               | 2         | 4.1666665        | 6.749E-01        | 1                |
| KEGG:00750           | Vitamin B6 metabolism                               | 2         | 14.285714        | 7.777E-02        | 1                |
| KEGG:00906           | Carotenoid biosynthesis                             | 2         | 4.6511626        | 6.547E-01        | 1                |
| KEGG:00940           | Phenylpropanoid biosynthesis                        | 7         | 4.9295774        | 3.370E-01        | 1                |
| KEGG:03008           | Ribosome biogenesis in eukaryotes                   | 8         | 5.16129          | 2.503E-01        | 1                |
| KEGG:03410           | Base excision repair                                | 3         | 5.769231         | 2.514E-01        | 1                |
| KEGG:04070           | Phosphatidylinositol signaling system               | 5         | 5.263158         | 2.501E-01        | 1                |
| KEGG:04075           | Plant hormone signal transduction                   | 16        | 4                | 4.706E-01        | 1                |
| KEGG:04145           | Phagosome                                           | 7         | 4.516129         | 3.644E-01        | 1                |
| <b>S-specific up</b> |                                                     |           |                  |                  |                  |
| <b>KEGG:04626</b>    | <b>Plant-pathogen interaction</b>                   | <b>18</b> | <b>7.4380164</b> | <b>1.367E-06</b> | <b>1.914E-05</b> |
| KEGG:00480           | Glutathione metabolism                              | 8         | 5.714285818      | 6.085E-03        | 6.519E-02        |
| KEGG:04075           | Plant hormone signal transduction                   | 16        | 4                | 8.457E-03        | 1.184E-01        |
| KEGG:04130           | SNARE interactions in vesicular transport           | 5         | 7.352941         | 1.164E-02        | 1.630E-01        |
| KEGG:03020           | RNA polymerase                                      | 4         | 7.4074073        | 2.292E-02        | 3.208E-01        |
| KEGG:04140           | Regulation of autophagy                             | 3         | 8.333333         | 3.521E-02        | 4.929E-01        |
| KEGG:04145           | Phagosome                                           | 7         | 4.516129         | 3.653E-02        | 5.115E-01        |
| KEGG:00430           | Taurine and hypotaurine metabolism                  | 2         | 11.764706        | 4.499E-02        | 6.299E-01        |
| KEGG:00230           | Purine metabolism                                   | 9         | 4.0358744        | 4.541E-02        | 6.358E-01        |
| KEGG:00290           | Valine, leucine and isoleucine biosynthesis         | 2         | 5.1282053        | 1.851E-01        | 1                |
| KEGG:00592           | alpha-Linolenic acid metabolism                     | 2         | 4                | 2.671E-01        | 1                |
| KEGG:00906           | Carotenoid biosynthesis                             | 2         | 4.6511626        | 2.146E-01        | 1                |
| KEGG:00920           | Sulfur metabolism                                   | 3         | 5.882353         | 8.285E-02        | 1                |
| KEGG:02010           | ABC transporters                                    | 2         | 6.8965516        | 1.151E-01        | 1                |

**S-specific down**

|                   |                                                     |          |                  |                  |                  |
|-------------------|-----------------------------------------------------|----------|------------------|------------------|------------------|
| <b>KEGG:00196</b> | <b>Photosynthesis</b>                               | <b>7</b> | <b>18.918919</b> | <b>4.328E-05</b> | <b>1.125E-03</b> |
| KEGG:00900        | Terpenoid backbone biosynthesis                     | 6        | 10.169492        | 4.515E-03        | 1.174E-01        |
| KEGG:00500        | Starch and sucrose metabolism                       | 11       | 5.4726367        | 2.177E-02        | 5.661E-01        |
| KEGG:00400        | Phenylalanine, tyrosine and tryptophan biosynthesis | 6        | 7.142857         | 2.372E-02        | 6.168E-01        |
| KEGG:00071        | Fatty acid metabolism                               | 3        | 4.477612         | 2.627E-01        | 1                |
| KEGG:00100        | Steroid biosynthesis                                | 2        | 5.263158         | 2.676E-01        | 1                |
| KEGG:00195        | Photosynthesis                                      | 5        | 6.0240965        | 6.907E-02        | 1                |
| KEGG:00230        | Purine metabolism                                   | 9        | 4.0358744        | 1.982E-01        | 1                |
| KEGG:00250        | Alanine, aspartate and glutamate metabolism         | 5        | 5.376344         | 1.006E-01        | 1                |
| KEGG:00260        | Glycine, serine and threonine metabolism            | 5        | 5.5555553        | 9.050E-02        | 1                |
| KEGG:00270        | Cysteine and methionine metabolism                  | 7        | 4.827586         | 1.098E-01        | 1                |
| KEGG:00350        | Tyrosine metabolism                                 | 3        | 5                | 2.130E-01        | 1                |
| KEGG:00380        | Tryptophan metabolism                               | 3        | 5.6603775        | 1.657E-01        | 1                |
| KEGG:00450        | Selenocompound metabolism                           | 2        | 5.4054055        | 2.577E-01        | 1                |
| KEGG:00600        | Sphingolipid metabolism                             | 2        | 7.4074073        | 1.602E-01        | 1                |
| KEGG:00630        | Glyoxylate and dicarboxylate metabolism             | 6        | 5.3097343        | 1.260E-01        | 1                |
| KEGG:00640        | Propanoate metabolism                               | 2        | 4.1666665        | 3.659E-01        | 1                |
| KEGG:00710        | Carbon fixation in photosynthetic organisms         | 8        | 5.3691278        | 6.154E-02        | 1                |
| KEGG:00790        | Folate biosynthesis                                 | 2        | 7.4074073        | 1.602E-01        | 1                |
| KEGG:00906        | Carotenoid biosynthesis                             | 2        | 4.6511626        | 3.171E-01        | 1                |
| KEGG:00909        | Sesquiterpenoid and triterpenoid biosynthesis       | 2        | 8.333333         | 1.324E-01        | 1                |
| KEGG:00910        | Nitrogen metabolism                                 | 3        | 4.6153846        | 2.483E-01        | 1                |
| KEGG:00920        | Sulfur metabolism                                   | 4        | 7.8431373        | 4.566E-02        | 1                |
| KEGG:00941        | Flavonoid biosynthesis                              | 3        | 8.571428         | 6.482E-02        | 1                |
| KEGG:00966        | Glucosinolate biosynthesis                          | 2        | 5                | 2.875E-01        | 1                |
| KEGG:02010        | ABC transporters                                    | 3        | 10.344828        | 4.057E-02        | 1                |
| KEGG:03030        | DNA replication                                     | 4        | 5                | 1.627E-01        | 1                |

---

**Supplementary Table 4** Transcriptome changes for genes involved in antioxidation, Ca<sup>2+</sup> signalling and WRKY transcription factors*Brassica oleracea*

| Gene ID               | Arabidopsis<br>homologue | Description                                           | RPKM value |        |        |       |       |       | Log2(Fold change) |       |       |       |
|-----------------------|--------------------------|-------------------------------------------------------|------------|--------|--------|-------|-------|-------|-------------------|-------|-------|-------|
|                       |                          |                                                       | R0         | R6     | R12    | S0    | S6    | S12   | R-6               | R6-12 | S-6   | S6-12 |
| Antioxidation related |                          |                                                       |            |        |        |       |       |       |                   |       |       |       |
| Bol026381             | AT2G28190                | CSD2 (COPPER/ZINC SUPEROXIDE DISMUTASE                | 35.0       | 14.1   | 28.3   | 96.8  | 53.0  | 34.2  | -1.31             | 1.01  |       |       |
| Bol044394             | AT3G56350                | superoxide dismutase (Mn), putative                   | 1.3        | 7.0    | 1.0    | 4.3   | 2.7   | 5.8   | 2.40              | -2.75 |       |       |
| Bol029708             | AT1G12520                | ATCCS (COPPER CHAPERONE FOR SOD1)                     | 74.9       | 795.5  | 355.5  | 351.2 | 230.4 | 304.6 | 3.41              | -1.16 |       |       |
| Bol037061             | AT4G18360                | (S)-2-hydroxy-acid oxidase; peroxisomal, putative     | 5.1        | 8.6    | 22.1   | 4.2   | 7.1   | 6.3   |                   | 1.35  |       |       |
| Bol006556             | AT1G08570                | ACHT4 (ATYPICAL CYS HIS RICH THIOREDOXIN              | 21.6       | 45.8   | 38.6   | 34.2  | 57.3  | 52.2  | 1.08              |       |       |       |
| Bol044748             | AT2G22420                | peroxidase 17                                         | 18.1       | 96.8   | 58.6   | 44.9  | 74.7  | 66.2  | 2.42              |       |       |       |
| Bol015837             | AT5G64120                | peroxidase, putative                                  | 0.1        | 1.6    | 6.6    | 0.2   | 0.3   | 0.1   | 3.49              | 2.04  |       |       |
| Bol026246             | AT1G73680                | pathogen-responsive alpha-dioxygenase, peroxidase act | 21.9       | 44.6   | 35.6   | 30.3  | 24.2  | 30.2  | 1.03              |       |       |       |
| Bol039416             | AT1G73680                | pathogen-responsive alpha-dioxygenase, peroxidase act | 1.6        | 4.2    | 2.3    | 3.7   | 2.1   | 1.2   | 1.38              |       |       |       |
| Bol014449             | AT3G63080                | ATGPX5 (glutathione peroxidase 5)                     | 8.6        | 27.0   | 16.2   | 17.4  | 19.2  | 32.4  | 1.65              |       |       |       |
| Bol040405             | AT3G13750                | BGAL1 (Beta galactosidase 1),peroxidase               | 38.2       | 324.4  | 731.8  | 224.7 | 362.5 | 381.3 | 3.09              | 1.17  |       |       |
| Bol005945             | AT3G13750                | BGAL1 (Beta galactosidase 1),peroxidase               | 35.6       | 160.9  | 278.2  | 48.9  | 97.5  | 96.0  | 2.18              |       |       |       |
| Bol025454             | AT1G20630                | CAT1                                                  | 36.1       | 111.9  | 811.8  | 123.6 | 119.5 | 106.6 | 1.63              | 2.86  |       |       |
| Bol013716             | AT4G35090                | CAT2                                                  | 3.7        | 4.7    | 14.9   | 7.8   | 7.9   | 13.1  |                   | 1.68  |       |       |
| Bol034639             | AT4G35090                | CAT2                                                  | 48.7       | 53.8   | 145.1  | 296.8 | 55.4  | 79.1  |                   | 1.43  | -2.42 |       |
| Bol024259             | AT4G35090                | CAT2                                                  | 300.5      | 167.5  | 347.0  | 627.7 | 169.3 | 184.4 |                   | 1.05  | -1.89 |       |
| Bol026973             | AT1G20620                | CAT3                                                  | 27.0       | 69.1   | 69.4   | 60.0  | 67.3  | 41.5  | 1.35              |       |       |       |
| Bol040250             | AT5G36940                | CAT3                                                  | 4.0        | 17.3   | 17.6   | 20.2  | 27.7  | 21.2  | 2.11              |       |       |       |
| Bol003831             | AT3G03720                | CAT4                                                  | 3.2        | 8.2    | 8.6    | 6.3   | 11.1  | 10.8  | 1.38              |       |       |       |
| Bol010903             | AT2G02390                | ATGSTZ1                                               | 1.9        | 12.2   | 20.8   | 5.3   | 7.5   | 6.0   | 2.66              |       |       |       |
| Bol006068             | AT2G02930                | ATGSTF3                                               | 56.3       | 137.2  | 164.0  | 12.5  | 81.5  | 65.6  | 1.29              |       |       | 2.40  |
| Bol016517             | AT2G02930                | ATGSTF3                                               | 893.5      | 2332.2 | 1658.6 | 103.1 | 556.9 | 975.0 | 1.38              |       | 2.43  |       |
| Bol033291             | AT2G29480                | ATGSTU2                                               | 1.0        | 2.2    | 6.9    | 2.0   | 8.2   | 9.8   |                   | 1.63  | 2.04  |       |
| Bol033290             | AT2G29470                | ATGSTU3                                               | 0.3        | 3.1    | 5.7    | 0.7   | 0.5   | 15.3  | 3.35              |       |       | 4.80  |
| Bol023071             | AT3G09270                | ATGSTU8                                               | 0.7        | 0.5    | 0.4    | 0.1   | 1.9   | 1.9   |                   |       | 4.29  |       |
| Bol009790             | AT1G17170                | ATGSTU24                                              | 28.4       | 28.5   | 75.9   | 6.0   | 3.1   | 15.3  |                   | 1.41  |       | 2.28  |

|                                    |           |                                            |       |       |       |       |       |       |       |       |       |
|------------------------------------|-----------|--------------------------------------------|-------|-------|-------|-------|-------|-------|-------|-------|-------|
| Bol039366                          | AT1G74590 | ATGSTU10                                   | 0.5   | 0.5   | 3.0   | 0.4   | 0.5   | 1.6   | 2.53  |       |       |
| Ca <sup>2+</sup> signaling related |           |                                            |       |       |       |       |       |       |       |       |       |
| Bol032583                          | AT3G25600 | calcium ion binding                        | 8.9   | 16.2  | 12.6  | 10.6  | 28.9  | 15.0  | 1.44  |       |       |
| Bol032916                          | -         | calcium ion binding                        | 4.4   | 4.1   | 4.2   | 9.0   | 5.0   | 14.4  | 1.51  |       |       |
| Bol012150                          | AT5G39670 | calcium-binding EF hand family protein     | 11.7  | 4.2   | 3.3   | 8.3   | 12.4  | 29.8  | -1.48 | 1.27  |       |
| Bol010002                          | -         | calcium-binding EF hand family protein     | 47.9  | 38.5  | 58.9  | 96.3  | 65.0  | 130.7 | 1.86  |       |       |
| Bol043000                          | AT3G29000 | calcium-binding EF hand family protein     | 3.9   | 1.6   | 1.1   | 2.6   | 4.9   | 26.8  | 2.46  |       |       |
| Bol006771                          | AT5G39670 | calcium-binding EF hand family protein     | 3.8   | 0.7   | 1.1   | 1.4   | 1.1   | 3.8   | -2.55 |       |       |
| Bol024879                          | AT3G47480 | calcium-binding EF hand family protein     | 37.4  | 10.5  | 13.2  | 8.6   | 4.3   | 6.6   | -1.83 |       |       |
| Bol036465                          | AT5G39670 | calcium-binding EF hand family protein     | 25.7  | 8.7   | 7.3   | 8.9   | 6.6   | 11.6  | -1.56 |       |       |
| Bol013114                          | -         | calcium-binding EF hand family protein     | -     | 0.8   | 1.6   | 0.6   | 0.7   | 1.4   | 9.69  |       |       |
| Bol023625                          | AT1G24620 | calcium-binding pollen allergen, putative  | 1.5   | 5.6   | 3.9   | 0.5   | 3.3   | 4.7   | 1.94  |       |       |
| Bol028357                          | AT4G20780 | calcium-binding protein, putative          | 7.9   | 8.8   | 3.6   | 3.5   | 11.2  | 29.4  | -1.30 | 1.68  | 1.39  |
| Bol024333                          | AT4G20780 | calcium-binding protein, putative          | 78.8  | 314.0 | 102.1 | 29.8  | 102.5 | 174.5 | 2.00  | -1.63 | 1.79  |
| Bol029597                          | AT2G46600 | calcium-binding protein, putative          | 42.7  | 41.8  | 52.5  | 28.2  | 45.7  | 109.0 | 1.26  |       |       |
| Bol023797                          | -         | calcium-binding protein, putative          | 13.1  | 1.4   | 5.1   | 1.4   | 0.6   | -     | -3.23 | 1.88  |       |
| Bol030794                          | AT1G18210 | calcium-binding protein, putative          | 102.9 | 47.0  | 30.0  | 65.3  | 105.1 | 85.5  | -1.13 |       |       |
| Bol002750                          | AT3G19100 | calcium-dependent protein kinase, putative | 3.4   | 1.8   | 2.9   | 6.3   | 2.1   | 1.9   | -1.62 |       |       |
| Bol030994                          | AT3G19100 | calcium-dependent protein kinase, putative | 10.4  | 5.5   | 6.6   | 14.2  | 5.2   | 7.4   | -1.46 |       |       |
| Bol003626                          | AT3G19100 | calcium-dependent protein kinase, putative | 9.0   | 3.8   | 2.1   | 10.5  | 4.2   | 0.6   | -1.25 | -1.33 | -2.86 |
| Bol026232                          | AT1G73805 | calmodulin binding                         | 18.0  | 5.3   | 9.4   | 0.6   | 1.3   | 3.2   | -1.77 | 1.27  |       |
| Bol039988                          | AT1G73805 | calmodulin binding                         | 8.3   | 3.2   | 5.4   | 2.5   | 1.0   | 3.4   | -1.38 | 1.87  |       |
| Bol023302                          | AT3G22930 | calmodulin, putative                       | 65.3  | 49.0  | 38.2  | 14.6  | 29.6  | 50.5  | 1.23  |       |       |
| Bol027610                          | AT1G76650 | CALMODULIN-LIKE 38 (CML38)                 | 10.7  | 9.4   | 6.5   | 13.6  | 35.2  | 60.2  | 1.37  |       |       |
| Bol002305                          | AT3G50770 | calmodulin-related protein, putative       | 30.2  | 41.6  | 47.6  | 10.4  | 19.2  | 70.7  | 1.88  |       |       |
| Bol010737                          | AT3G01830 | calmodulin-related protein, putative       | 5.4   | 3.4   | 4.3   | 0.8   | 2.8   | 17.3  | 2.63  |       |       |
| Bol028942                          | AT4G37010 | caltractin, putative                       | 31.4  | 115.1 | 180.0 | 74.6  | 112.7 | 192.3 | 1.87  |       |       |
| Bol004202                          | AT2G27030 | CAM5 (CALMODULIN 5)                        | 96.5  | 116.8 | 121.8 | 134.3 | 315.3 | 334.7 | 1.23  |       |       |
| Bol020573                          | AT2G27030 | CAM5 (CALMODULIN 5)                        | 25.8  | 45.6  | 35.6  | 24.2  | 119.1 | 84.6  | 2.30  |       |       |
| Bol044303                          | AT2G27030 | CAM5 (CALMODULIN 5)                        | 68.7  | 32.1  | 34.2  | 37.8  | 40.5  | 37.4  | -1.98 |       |       |
| Bol016716                          | AT5G26920 | CBP60G (CAM-BINDING PROTEIN 60-LIKE.G)     | 30.8  | 9.4   | 19.0  | 4.5   | 10.7  | 11.7  | -1.71 | 1.17  | 1.27  |
| Bol012758                          | AT5G26920 | CBP60G (CAM-BINDING PROTEIN 60-LIKE.G)     | 3.8   | 2.0   | 4.9   | 0.4   | 1.7   | 1.6   | 1.35  | 2.22  |       |

|           |           |                                          |       |      |      |      |      |      |       |      |           |
|-----------|-----------|------------------------------------------|-------|------|------|------|------|------|-------|------|-----------|
| Bol035298 | AT5G42380 | CML37 (CALMODULIN LIKE 37)               | 11.6  | 3.9  | 2.1  | 3.3  | 2.8  | 15.3 | -1.59 |      | 2.44      |
| Bol007568 | AT4G04720 | CPK21                                    | 3.1   | 6.6  | 4.4  | 9.5  | 10.6 | 33.2 |       |      | 1.65      |
| Bol032679 | AT4G04710 | CPK22                                    | 3.2   | 2.4  | 2.6  | 1.3  | 1.2  | 2.7  |       |      | 1.23      |
| Bol027148 | AT5G66210 | CPK28                                    | 25.7  | 15.3 | 10.6 | 9.2  | 20.2 | 12.9 |       | 1.13 |           |
| Bol007592 | AT3G57530 | CPK32 (CALCIUM-DEPENDENT PROTEIN KINASE) | 17.4  | 45.0 | 53.6 | 17.1 | 33.2 | 21.2 | 1.37  |      |           |
| Bol005351 | AT5G37770 | TCH2 (TOUCH 2)                           | 154.0 | 62.6 | 51.8 | 44.1 | 93.1 | 72.0 | -1.30 | 1.77 |           |
| Bol030676 | AT2G46450 | ATCNGC12                                 | 13.5  | 9.3  | 41.2 | 0.5  | 6.4  | 2.3  |       | 1.61 | 3.82 2.36 |

## WRKY

|           |           |        |      |       |       |      |       |       |       |       |            |
|-----------|-----------|--------|------|-------|-------|------|-------|-------|-------|-------|------------|
| Bol020064 | AT2G03340 | WRKY3  | 7.7  | 5.2   | 5.6   | 10.5 | 2.5   | 2.0   |       | -2.48 |            |
| Bol007231 | -         | WRKY3  | 18.1 | 34.6  | 35.5  | 18.1 | 29.9  | 13.5  |       |       | -1.14      |
| Bol010361 | AT1G13960 | WRKY4  | 11.8 | 26.9  | 36.3  | 11.0 | 18.1  | 9.8   | 1.20  |       |            |
| Bol030382 | AT1G62300 | WRKY6  | 9.9  | 42.2  | 32.7  | 8.3  | 18.7  | 30.8  | 2.93  | 1.16  |            |
| Bol006350 | AT5G46350 | WRKY8  | 3.0  | 1.6   | 4.5   | 0.3  | 0.6   | 0.8   |       | 1.50  |            |
| Bol017448 | AT4G31550 | WRKY11 | 16.7 | 20.5  | 18.8  | 9.3  | 27.1  | 35.8  |       | 1.55  |            |
| Bol033735 | AT4G31550 | WRKY11 | 45.0 | 34.2  | 21.4  | 15.1 | 53.9  | 46.3  |       | 1.83  |            |
| Bol028817 | -         | WRKY13 | 1.5  | 0.6   | 2.2   | 1.8  | 0.5   | 2.2   |       |       | 2.19       |
| Bol041910 | AT2G24570 | WRKY17 | 27.5 | 22.5  | 20.4  | 15.7 | 23.7  | 51.1  |       |       | 1.20       |
| Bol033747 | AT4G31800 | WRKY18 | 23.7 | 7.6   | 15.2  | 5.4  | 12.4  | 18.4  | -1.63 | 1.20  |            |
| Bol017463 | AT4G31800 | WRKY18 | 20.3 | 11.8  | 24.5  | 2.3  | 5.0   | 9.0   |       | 1.53  |            |
| Bol017960 | AT4G31800 | WRKY18 | 18.1 | 3.3   | 5.3   | 3.6  | 2.9   | 4.0   | -2.46 |       |            |
| Bol011480 | AT4G01250 | WRKY22 | 17.3 | 22.3  | 16.3  | 6.7  | 29.9  | 27.7  |       | 2.16  |            |
| Bol002625 | AT2G30250 | WRKY25 | 2.3  | 4.6   | 6.3   | 1.5  | 5.6   | 7.4   |       | 1.85  |            |
| Bol033331 | AT2G30250 | WRKY25 | 17.5 | 32.8  | 51.0  | 15.0 | 32.0  | 33.5  |       | 1.96  |            |
| Bol024531 | AT5G07100 | WRKY26 | 64.1 | 75.6  | 75.4  | 15.4 | 37.4  | 21.2  |       | 1.28  |            |
| Bol037073 | AT4G18170 | WRKY28 | 2.3  | 6.8   | 6.2   | 3.9  | 14.0  | 15.4  | 1.57  | 1.83  |            |
| Bol042105 | -         | WRKY29 | 3.3  | 1.6   | 0.2   | 1.3  | -     | 1.3   |       | -3.33 | -1.39 1.37 |
| Bol022456 | -         | WRKY30 | 1.9  | 6.9   | 3.2   | -    | 1.2   | 4.7   | 1.90  | -1.12 | 1.23 1.96  |
| Bol036212 | AT5G24110 | WRKY30 | 3.6  | 13.3  | 6.8   | 0.4  | 3.5   | 4.9   | 1.87  | 3.15  |            |
| Bol028485 | AT4G22070 | WRKY31 | 0.9  | 0.3   | 1.4   | 0.2  | 0.1   | 0.5   |       | 2.37  |            |
| Bol020355 | AT2G38470 | WRKY33 | 59.3 | 121.9 | 121.8 | 26.6 | 129.3 | 117.4 | 1.39  | 2.28  |            |
| Bol035694 | AT5G22570 | WRKY38 | 43.6 | 1.7   | 6.8   | 3.9  | 0.4   | 1.8   | -4.66 | 1.98  | -3.46      |
| Bol036034 | AT5G22570 | WRKY38 | 34.0 | 12.6  | 11.7  | 6.1  | 7.9   | 14.8  | -1.43 |       |            |

|           |           |        |      |       |       |      |       |       |       |       |      |       |
|-----------|-----------|--------|------|-------|-------|------|-------|-------|-------|-------|------|-------|
| Bol038569 | AT1G80840 | WRKY40 | 15.0 | 14.2  | 18.3  | 15.9 | 35.8  | 33.2  |       |       | 1.18 |       |
| Bol040536 | AT1G80840 | WRKY40 | 24.5 | 25.1  | 24.7  | 11.4 | 47.0  | 76.9  |       |       | 2.46 |       |
| Bol021481 | -         | WRKY40 | 0.8  | 0.6   | 0.4   | 1.5  | 0.6   | 2.4   |       |       |      | 2.15  |
| Bol011769 | AT4G11070 | WRKY41 | 7.7  | 14.2  | 10.7  | 4.8  | 15.3  | 39.8  |       |       | 1.67 | 1.38  |
| Bol030560 | AT4G04450 | WRKY42 | 2.3  | 7.0   | 4.0   | 2.3  | 3.3   | 2.4   | 1.62  |       |      |       |
| Bol013898 | AT3G01970 | WRKY45 | 14.5 | 109.1 | 132.7 | 30.3 | 100.6 | 271.4 | 2.91  |       | 1.73 | 1.43  |
| Bol000927 | AT2G46400 | WRKY46 | 60.2 | 26.3  | 36.0  | 19.4 | 25.1  | 40.1  | -1.19 |       |      |       |
| Bol011419 | AT4G01720 | WRKY47 | 16.8 | 93.0  | 60.7  | 4.1  | 9.8   | 14.7  | 2.47  |       | 1.27 |       |
| Bol001371 | AT5G49520 | WRKY48 | 2.1  | 5.9   | 5.1   | 0.5  | 1.1   | 0.9   | 1.46  |       |      |       |
| Bol005635 | AT5G43290 | WRKY49 | 3.8  | 1.1   | 1.0   | 5.0  | 3.0   | 0.7   | -1.79 |       |      | -2.14 |
| Bol012741 | AT5G26170 | WRKY50 | 38.1 | 14.0  | 14.0  | 4.5  | 7.9   | 11.4  | -1.44 |       |      |       |
| Bol022304 | AT5G26170 | WRKY50 | 8.8  | 3.9   | 5.5   | 3.4  | 4.5   | 4.3   | -1.18 |       |      |       |
| Bol015902 | AT5G64810 | WRKY51 | 38.5 | 15.4  | 26.6  | 7.4  | 17.4  | 22.1  | -1.32 |       | 1.23 |       |
| Bol019066 | AT5G64810 | WRKY51 | 23.9 | 10.2  | 10.8  | 1.0  | 4.5   | 3.5   | -1.23 |       | 2.14 |       |
| Bol009609 | AT4G23810 | WRKY53 | 52.7 | 149.1 | 78.1  | 7.3  | 54.3  | 66.3  | 1.51  |       | 2.89 |       |
| Bol042130 | AT4G23810 | WRKY53 | 9.3  | 7.9   | 6.9   | 0.2  | 3.4   | 4.7   |       |       | 4.15 |       |
| Bol005121 | AT2G40750 | WRKY54 | 78.4 | 55.0  | 48.4  | 17.3 | 49.8  | 75.1  |       |       | 1.52 |       |
| Bol006887 | AT2G40750 | WRKY54 | 2.5  | 0.6   | 0.3   | 0.6  | 0.4   | 0.4   | -2.83 |       |      |       |
| Bol002547 | -         | WRKY55 | 0.3  | -     | 1.4   | 0.1  | 0.1   | 0.2   |       | 1.44  |      |       |
| Bol000854 | AT5G01900 | WRKY62 | 0.4  | 0.4   | 2.3   | 0.8  | 1.0   | 2.6   |       | 2.64  |      |       |
| Bol005975 | AT5G01900 | WRKY62 | 19.1 | 7.1   | 9.0   | 2.2  | 1.9   | 1.1   | -1.43 |       |      |       |
| Bol004954 | AT3G58710 | WRKY69 | 3.6  | 6.0   | 4.6   | 4.1  | 8.8   | 6.5   |       |       | 1.98 |       |
| Bol044275 | AT3G56400 | WRKY70 | 34.1 | 8.1   | 5.6   | 2.8  | 8.3   | 15.5  | -2.72 |       | 1.58 |       |
| Bol002548 | AT3G56400 | WRKY70 | 79.7 | 41.8  | 45.1  | 8.7  | 40.3  | 35.7  |       |       | 2.22 |       |
| Bol001387 | -         | WRKY74 | 4.9  | 6.8   | 3.2   | 5.9  | 4.6   | 5.0   |       | -1.93 |      |       |
| Bol034214 | AT5G13080 | WRKY75 | 4.4  | 2.3   | 15.2  | 0.8  | 2.7   | 7.7   |       | 2.76  |      | 1.52  |

**Continued** Transcriptome changes for genes involved in antioxidation, Ca<sup>2+</sup> signalling and WRKY transcription factors.

***Rice (Oryza sativa)***

| Gene ID        | <i>Arabidopsis</i><br><i>homologue</i> | Description                          | RPKM value |       |       | Log2(Fold change) |        |
|----------------|----------------------------------------|--------------------------------------|------------|-------|-------|-------------------|--------|
|                |                                        |                                      | Os0        | Os6   | Os12  | Os6-0             | Os12-6 |
| LOC_Os02g02400 | -                                      | Catalase isozyme A                   | 238.1      | 730.6 | 289.6 | 1.62              | -1.33  |
| LOC_Os07g48060 | -                                      | Cationic peroxidase 1                | 0.5        | 10.7  | 4.0   | 4.15              | -1.42  |
| LOC_Os01g73170 | AT1G71695                              | Cationic peroxidase SPC4 (Precursor) | 48.7       | 163.0 | 134.5 | 1.75              |        |
| LOC_Os01g73200 | AT1G71695                              | Cationic peroxidase SPC4 (Precursor) | 0.3        | 118.3 | 130.9 | 8.25              |        |
| LOC_Os04g59190 | -                                      | Cationic peroxidase SPC4 (Precursor) | 0.3        | 15.9  | 3.6   | 5.32              | -2.14  |
| LOC_Os04g59210 | -                                      | Cationic peroxidase SPC4 (Precursor) | 0.0        | 0.9   | 0.2   | 3.69              |        |
| LOC_Os01g22230 | -                                      | Peroxidase 1 (Precursor)             | 1.0        | 5.6   | 3.8   | 2.45              |        |
| LOC_Os01g22352 | -                                      | Peroxidase 1 (Precursor)             | 2.5        | 13.4  | 13.3  | 2.41              |        |
| LOC_Os01g22370 | -                                      | Peroxidase 1 (Precursor)             | 12.8       | 34.1  | 41.4  | 1.43              |        |
| LOC_Os01g19020 | -                                      | Peroxidase 2 (Precursor)             | 0.1        | 10.1  | 1.0   | 5.86              | -3.25  |
| LOC_Os07g48010 | -                                      | Peroxidase 2 (Precursor)             | 9.1        | 119.9 | 78.8  | 3.71              |        |
| LOC_Os07g48020 | -                                      | Peroxidase 2 (Precursor)             | 44.7       | 303.8 | 482.5 | 2.77              |        |
| LOC_Os06g46799 | AT1G05260                              | Peroxidase 3 (Precursor)             | 1.1        | 11.3  | 9.5   | 3.34              |        |
| LOC_Os04g55740 | -                                      | Peroxidase 4                         | 0.1        | 6.4   | 0.7   | 5.15              | -3.23  |
| LOC_Os03g02920 | -                                      | Peroxidase 5                         | 5.0        | 15.6  | 4.6   | 1.64              | -1.75  |
| LOC_Os04g59150 | -                                      | Peroxidase 12                        | 14.5       | 257.0 | 271.4 | 4.16              |        |
| LOC_Os10g02040 | AT2G38380                              | Peroxidase 15                        | 0.5        | 21.1  | 18.8  | 5.14              |        |
| LOC_Os06g48030 | AT3G49960                              | Peroxidase 16 (Precursor)            | 1.1        | 23.0  | 22.3  | 4.30              |        |
| LOC_Os09g29490 | AT2G22420                              | Peroxidase 17 (Precursor)            | 36.1       | 235.0 | 373.8 | 2.86              |        |
| LOC_Os01g16450 | AT2G39040                              | Peroxidase 24 (Precursor)            | 0.6        | 8.0   | 0.7   | 3.69              | -3.44  |
| LOC_Os06g32990 | -                                      | Peroxidase 36 (Precursor)            | 0.8        | 103.5 | 174.4 | 6.84              |        |
| LOC_Os08g02110 | AT4G33420                              | Peroxidase 47 (Precursor)            | 10.1       | 19.9  | 40.4  |                   | 1.02   |
| LOC_Os06g35520 | -                                      | Peroxidase 52 (Precursor)            | 0.2        | 17.6  | 4.9   | 5.94              | -1.83  |
| LOC_Os02g14430 | -                                      | Peroxidase 70 (Precursor)            | 2.9        | 256.4 | 161.6 | 6.43              |        |
| LOC_Os03g13210 | -                                      | Peroxidase N (Precursor)             | 5.2        | 96.0  | 42.9  | 4.20              | -1.16  |
| LOC_Os10g02070 | AT5G19890                              | Peroxidase N (Precursor)             | 0.2        | 19.6  | 10.0  | 5.90              |        |

**Supplementary Table 5** Significantly pathways ( $Q < 0.05$ ) in resistant and susceptible groups of *Brassica oleracea* during 0 to 12 hpi by *Sclerotinia sclerotiorum*

| ID      | Pathway                                               | Genes in genome | R6 vs. R0 |         |           | S6 vs. S0 |         |          | R12 vs. R6 |         |          | S12 vs. S6 |         |          |
|---------|-------------------------------------------------------|-----------------|-----------|---------|-----------|-----------|---------|----------|------------|---------|----------|------------|---------|----------|
|         |                                                       |                 | Nr. DEGs  | Q value | Up ratio* | Nr. DEGs  | Q value | Up ratio | Nr. DEGs   | Q value | Up ratio | Nr. DEGs   | Q value | Up ratio |
| ko04626 | Plant-pathogen interaction                            | 1643            | 247       | 2.0E-03 | 32.4%     | 178       | 5.0E-02 | 69.1%    |            |         |          |            |         |          |
| ko04075 | Plant hormone signal transduction                     | 1634            | 261       | 4.0E-05 | 34.9%     | 191       | 2.0E-03 | 56.5%    |            |         |          |            |         |          |
| ko01100 | Metabolic pathways                                    | 5034            | 726       | 4.0E-06 | 33.5%     | 586       | 5.0E-10 | 37.5%    | 242        | 1.0E-06 | 56.2%    | 432        | 3.0E-02 | 34.3%    |
| ko00500 | Starch and sucrose metabolism                         | 651             | 125       | 4.0E-06 | 24.8%     | 93        | 1.0E-04 | 36.6%    |            |         |          |            |         |          |
| ko01110 | Biosynthesis of secondary metabolites                 | 2791            | 462       | 7.0E-11 | 30.5%     | 388       | 2.0E-16 | 34.0%    | 140        | 2.0E-04 | 67.1%    |            |         |          |
| ko00941 | Flavonoid biosynthesis                                | 297             | 70        | 1.0E-06 | 18.6%     | 56        | 2.0E-06 | 25.0%    |            |         |          |            |         |          |
| ko00940 | Phenylpropanoid biosynthesis                          | 490             | 112       | 2.0E-09 | 25.0%     | 93        | 4.0E-10 | 33.3%    | 35         | 1.0E-03 | 57.1%    |            |         |          |
| ko00944 | Flavone and flavonol biosynthesis                     | 93              | 20        | 3.0E-02 | 55.0%     | 21        | 7.0E-04 | 57.1%    |            |         |          |            |         |          |
| ko00591 | Linoleic acid metabolism                              | 38              | 11        | 2.0E-02 | 27.3%     | 12        | 7.0E-04 | 25.0%    |            |         |          |            |         |          |
| ko00053 | Ascorbate and aldarate metabolism                     | 157             | 31        | 2.0E-02 | 19.4%     | 24        | 4.0E-02 | 29.2%    |            |         |          |            |         |          |
| ko00966 | Glucosinolate biosynthesis                            | 105             | 26        | 2.0E-03 | 15.4%     | 31        | 6.0E-08 | 19.4%    | 16         | 2.0E-05 | 100.0%   |            |         |          |
| ko00945 | Stilbenoid, diarylheptanoid and gingerol biosynthesis | 370             | 74        | 1.0E-04 | 41.9%     | 62        | 3.0E-05 | 46.8%    |            |         |          |            |         |          |
| ko00592 | alpha-Linolenic acid metabolism                       | 144             | 37        | 9.0E-05 | 32.4%     | 31        | 6.0E-05 | 35.5%    |            |         |          |            |         |          |
| ko00360 | Phenylalanine metabolism                              | 245             | 59        | 4.0E-06 | 28.8%     | 45        | 6.0E-05 | 31.1%    | 21         | 2.0E-03 | 76.2%    |            |         |          |
| ko00906 | Carotenoid biosynthesis                               | 213             | 50        | 5.0E-05 | 14.0%     | 45        | 2.0E-06 | 22.2%    |            |         |          | 29         | 3.0E-02 | 27.6%    |
| ko00400 | Phenylalanine, tyrosine and tryptophan biosynthesis   | 93              | 22        | 1.0E-02 | 22.7%     | 20        | 2.0E-03 | 10.0%    |            |         |          |            |         |          |



|         |                                             |     |     |         |       |    |         |       |
|---------|---------------------------------------------|-----|-----|---------|-------|----|---------|-------|
| ko00260 | Glycine, serine and threonine metabolism    | 112 | 27  | 2.0E-03 | 25.9% |    |         |       |
| ko00520 | Amino sugar and nucleotide sugar metabolism | 286 | 50  | 3.0E-02 | 24.0% |    |         |       |
| ko00270 | Cysteine and methionine metabolism          | 214 | 39  | 3.0E-02 | 23.1% |    |         |       |
| ko00040 | Pentose and glucuronate interconversions    | 359 | 69  | 7.0E-04 | 14.5% |    |         |       |
| ko03010 | Ribosome                                    | 709 | 122 | 5.0E-04 | 7.4%  |    |         |       |
| ko00531 | Glycosaminoglycan degradation               | 43  |     |         |       | 10 | 2.0E-02 | 60.0% |
| ko02010 | ABC transporters                            | 147 |     |         |       | 26 | 5.0E-03 | 50.0% |
| ko01040 | Biosynthesis of unsaturated fatty acids     | 107 |     |         |       | 18 | 4.0E-02 | 33.3% |
| ko00902 | Monoterpenoid biosynthesis                  | 15  |     |         |       | 5  | 4.0E-02 | 20.0% |

---

\* The 'Up ratio' represents the percentage of up-regulated genes in the total altered genes involved in a certain pathway

**Supplementary Figure 1** Expression changes as estimated by RNA-Seq (black bars) and RT-PCR (grey bars) for 46 genes. Errors bars represent the standard deviation of three biological replicates of RT-PCR. The last 19 genes were normalized with *Actin3* and *actin7*, while the others were normalized with *Actin3*.

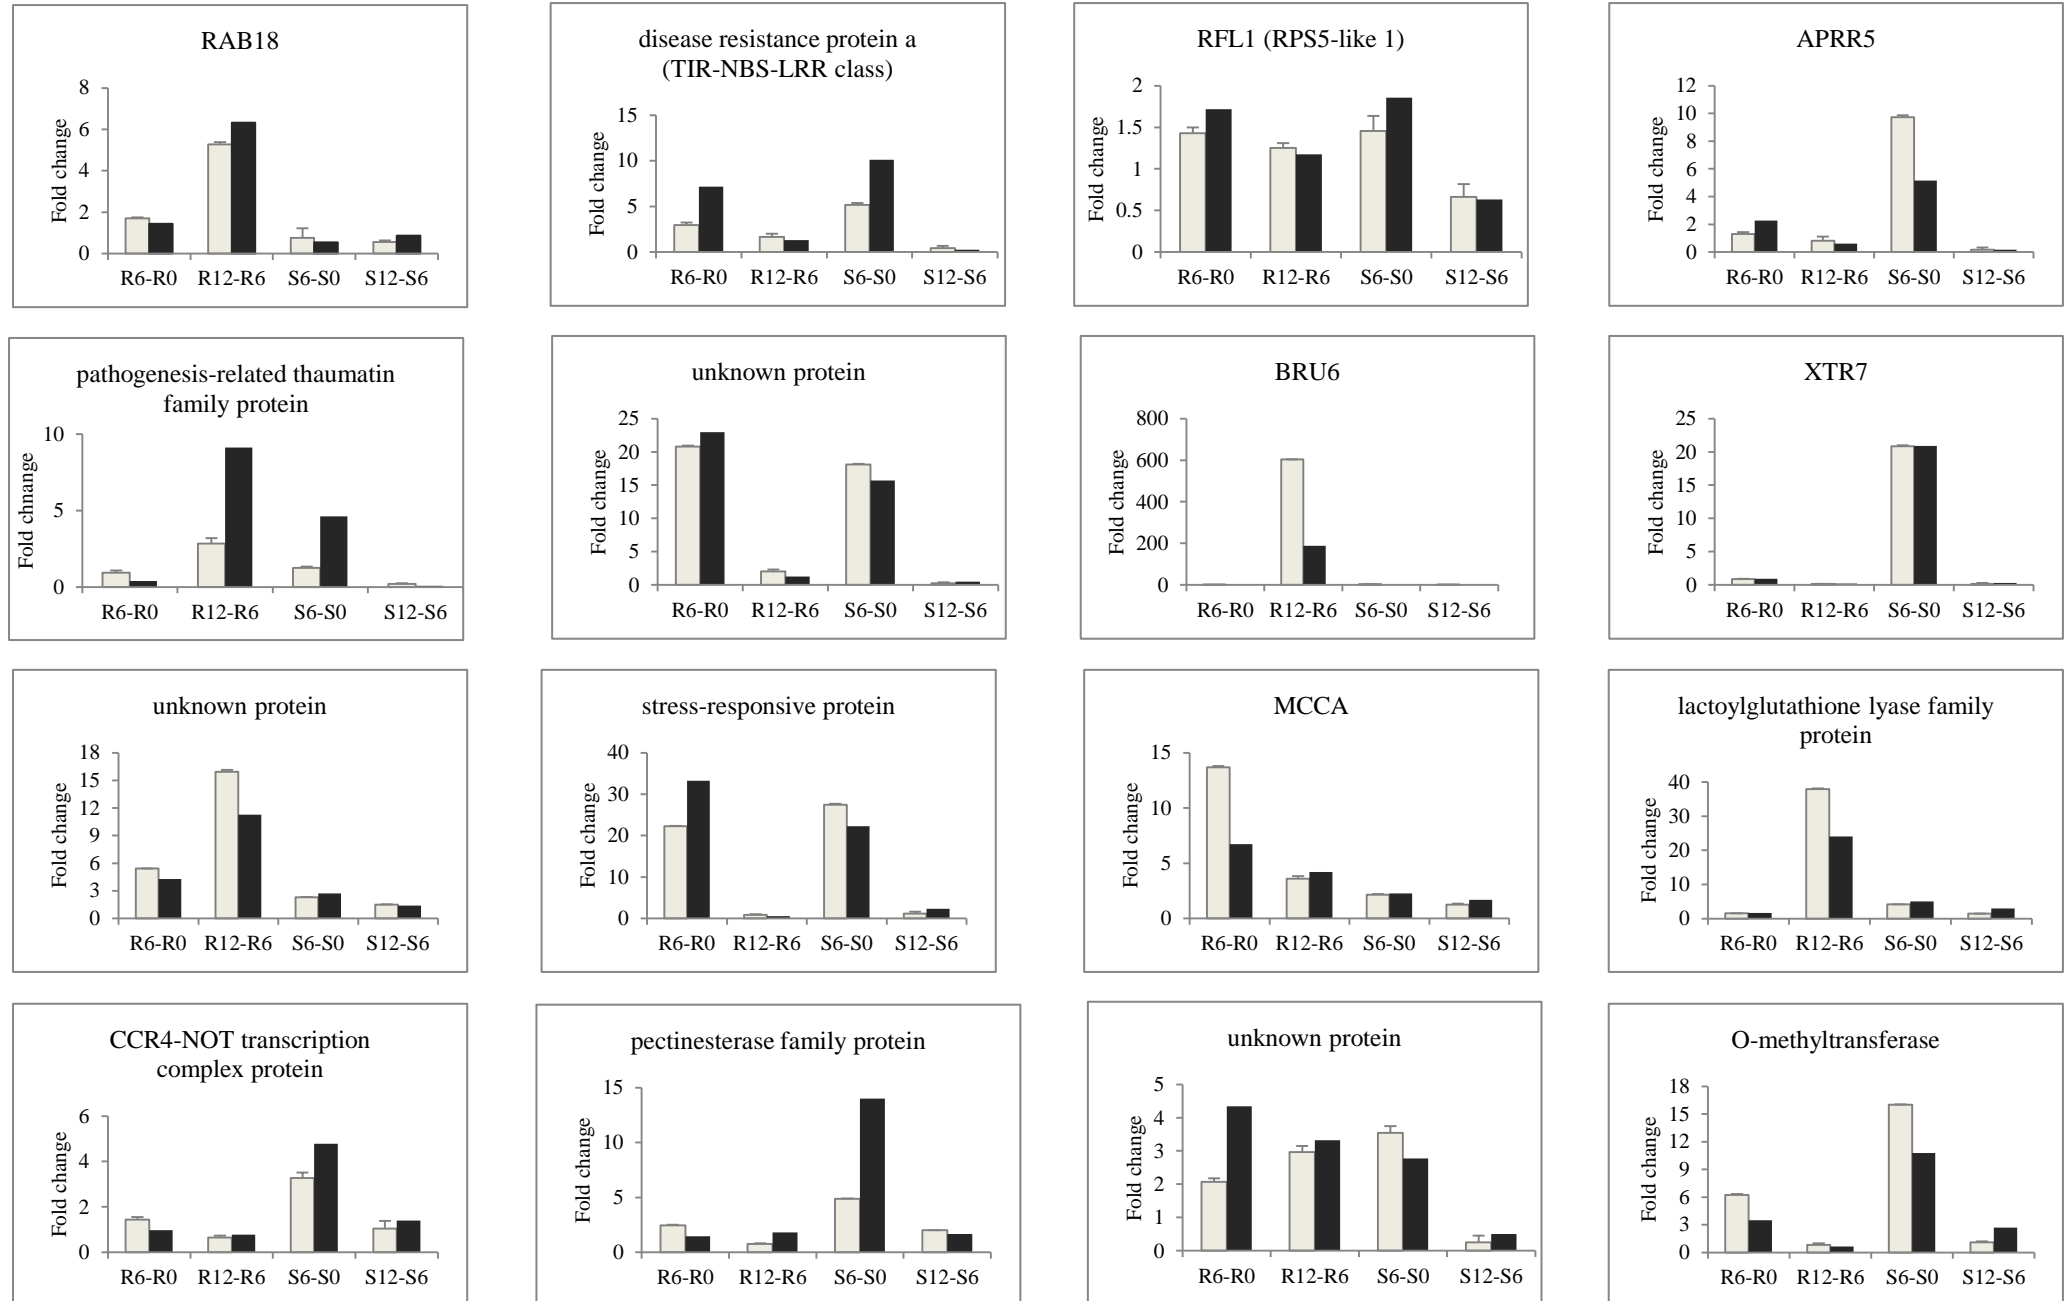

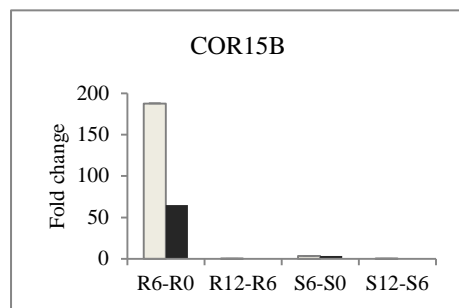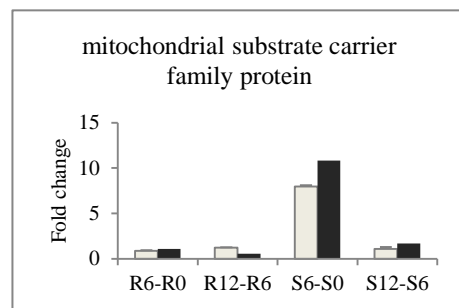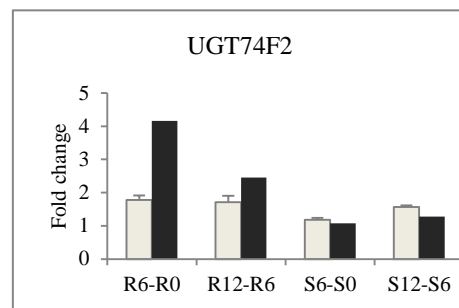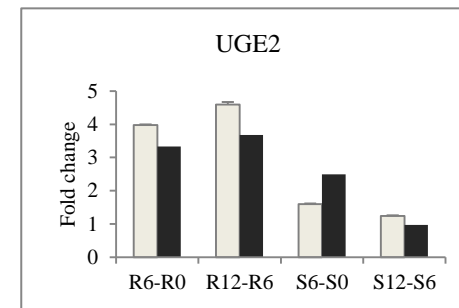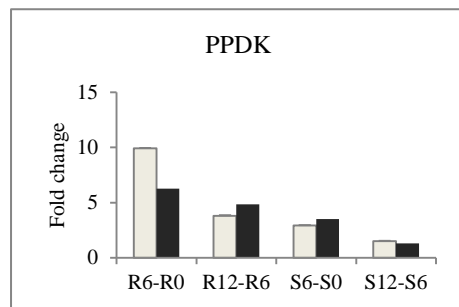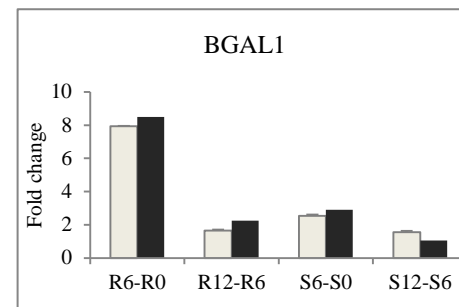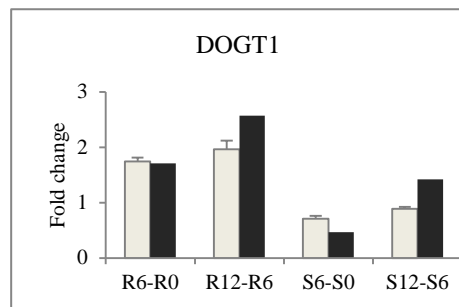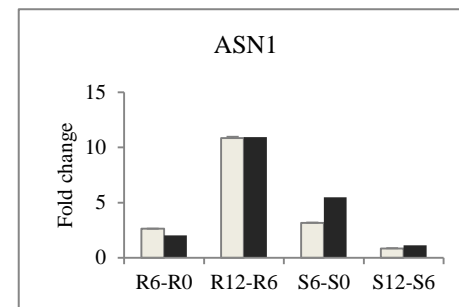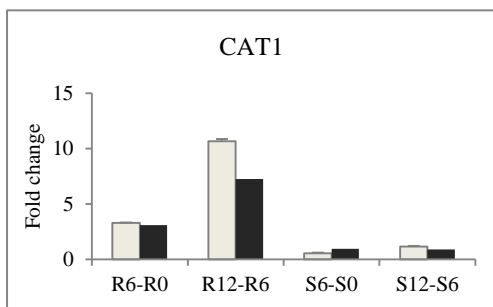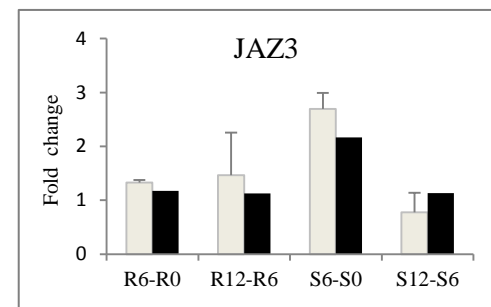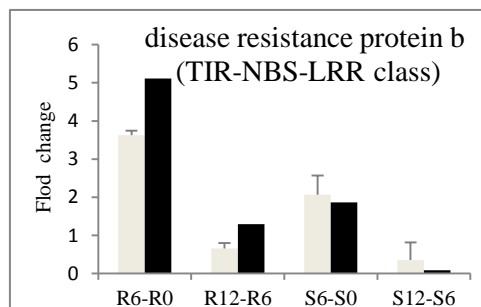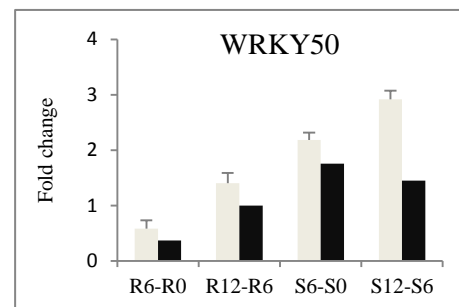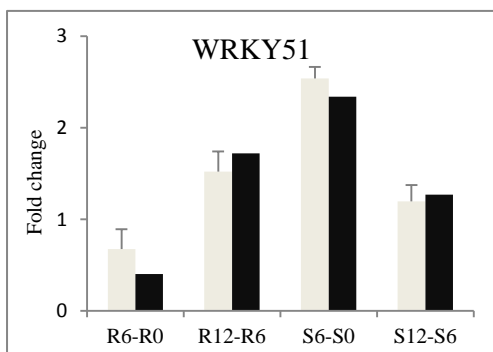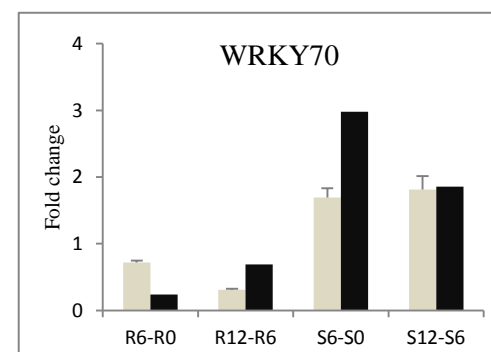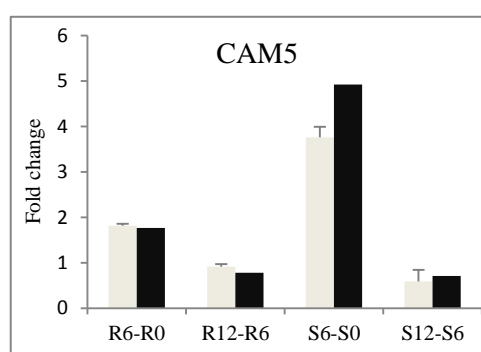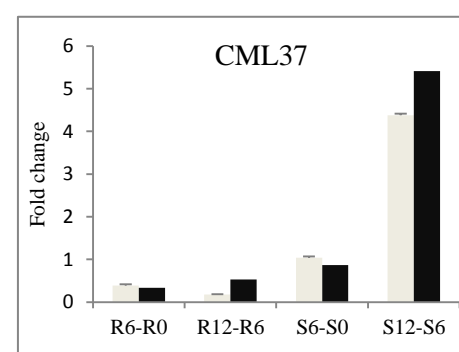

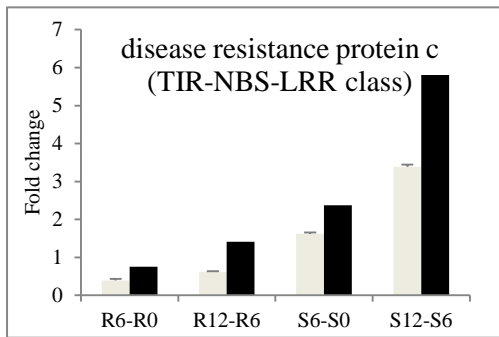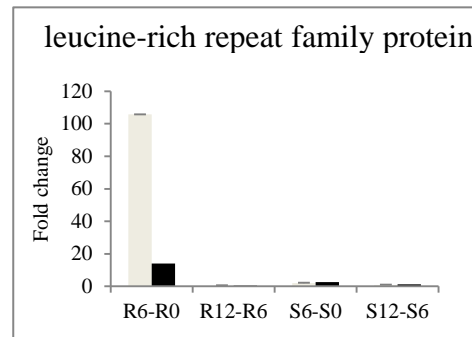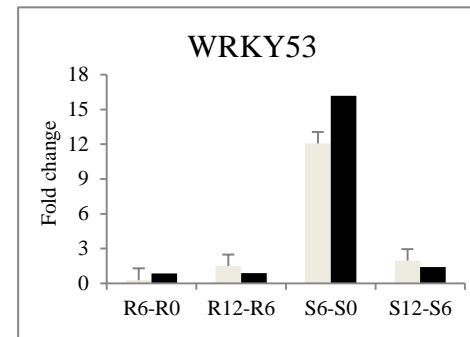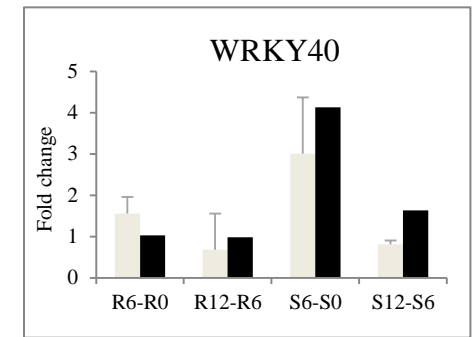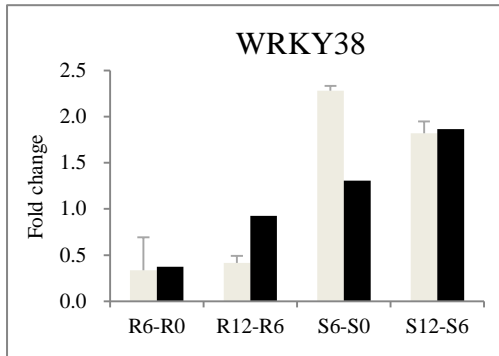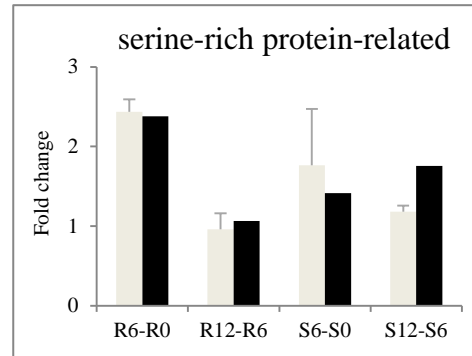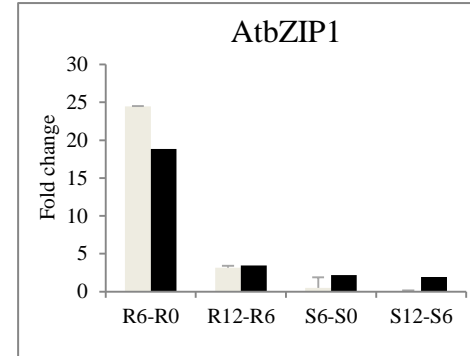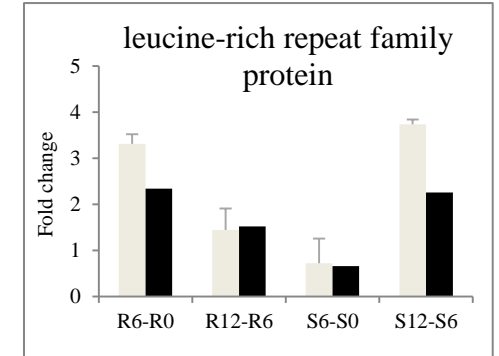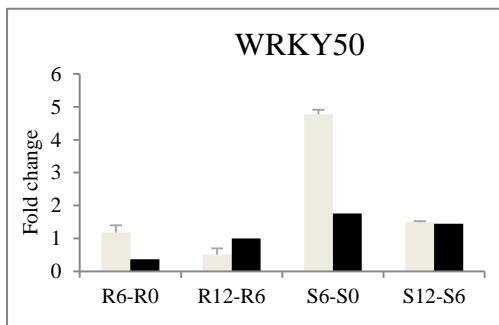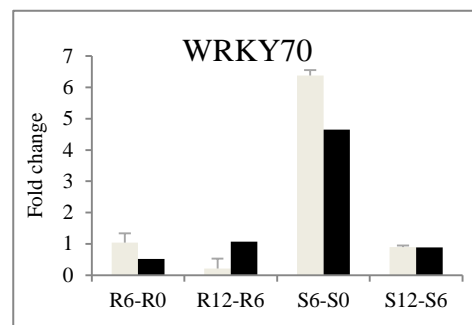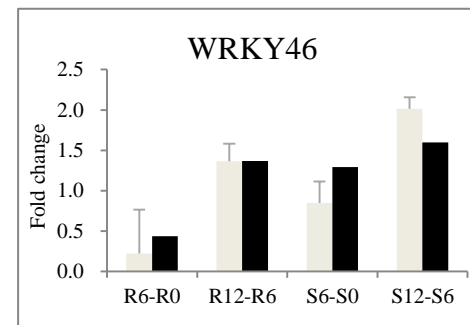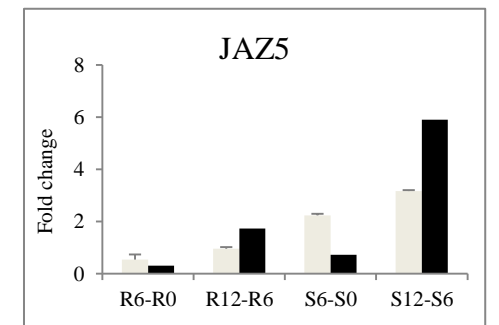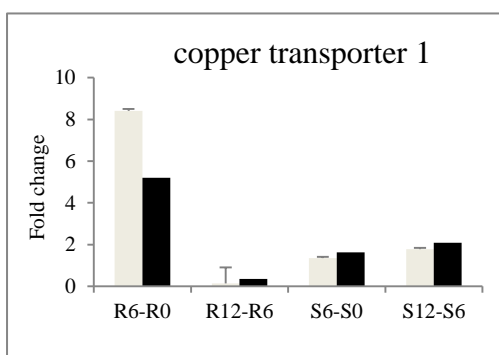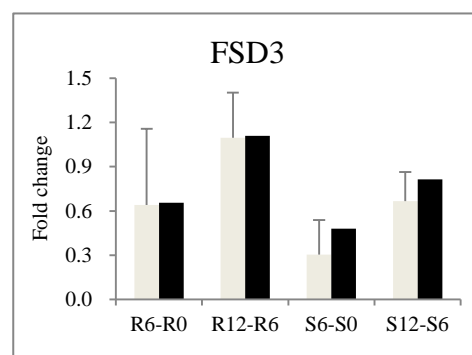

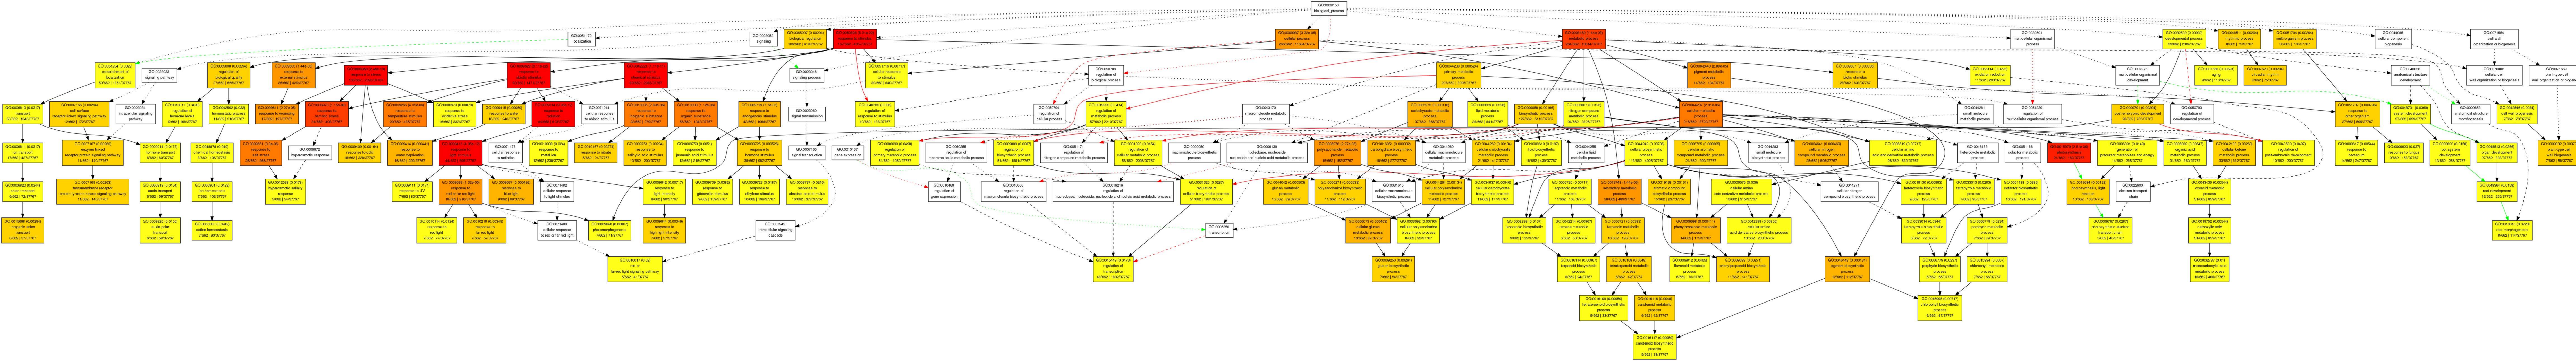

Supplement: Supplementary Information [file srep33706-s1.pdf]
